**Title: An essential mycolate remodeling program for mycobacterial adaptation in host cells**

2

**Authors:**

4 Eliza J.R. Peterson<sup>1</sup> (eliza.peterson@systemsbiology.org)  
Rebeca Bailo<sup>2</sup> (r.bailo@bham.ac.uk)  
6 Alissa C. Rothchild<sup>3</sup> (alissa.rothchild@cidresearch.org)  
Mario Arrieta-Ortiz<sup>1</sup> (mario.arrieta-ortiz@systemsbiology.org)  
8 Amardeep Kaur<sup>1</sup> (amardeep.kaur@systemsbiology.org)  
Min Pan<sup>1</sup> (min.pan@systemsbiology.org)  
10 Dat Mai<sup>3</sup> (dat.mai@cidresearch.org)  
Charlotte Cooper<sup>2</sup> (CXC637@student.bham.ac.uk)  
12 Alan Aderem<sup>3</sup> (alan.aderem@cidresearch.org)  
Apoorva Bhatt<sup>2</sup> (a.bhatt@bham.ac.uk)  
14 Nitin S. Baliga<sup>1,4,5</sup> (nitin.baliga@systemsbiology.org)

16 **Affiliations:**

<sup>1</sup>Institute for Systems Biology, Seattle, WA  
18 <sup>2</sup>School of Biosciences and Institute of Microbiology and Infection, University of Birmingham,  
Birmingham, UK  
20 <sup>3</sup>Center for Infectious Disease Research, Seattle, WA  
<sup>4</sup>Molecular and Cellular Biology Program, Departments of Microbiology and Biology, University of  
22 Washington, Seattle, WA  
<sup>5</sup>Lawrence Berkeley National Laboratories, Berkeley, CA

24 **One Sentence Summary:** Novel technology (Path-seq) discovers cell wall remodeling program  
during *Mycobacterium tuberculosis* infection of macrophages

26

**Abstract:**

28 The success of *Mycobacterium tuberculosis* (MTB) stems from its ability to remain hidden from the  
immune system within macrophages. Here, we report a new technology (Path-seq) to sequence miniscule  
30 amounts of MTB transcripts within up to million-fold excess host RNA. Using Path-seq we have  
discovered a novel transcriptional program for *in vivo* mycobacterial cell wall remodeling when the  
32 pathogen infects alveolar macrophages in mice. We have discovered that MadR transcriptionally  
modulates two mycolic acid desaturases *desA1/A2* to initially promote cell wall remodeling upon *in vitro*  
34 macrophage infection and, subsequently, reduces mycolate biosynthesis upon entering dormancy. We  
demonstrate that disrupting MadR program is lethal to diverse mycobacteria making this evolutionarily  
36 conserved regulator a prime antitubercular target for both early and late stages of infection.

38

40

42 **Main Text:**

44 *Mycobacterium tuberculosis* (MTB) infection occurs by inhalation of bacilli-containing aerosols. Alveolar macrophages, which line the airway, are the first host cells to phagocytize the bacteria. This  
46 initial contact of MTB with alveolar macrophages begins a complex battle between bacterial virulence  
48 and host immunity, orchestrated in large part by intricate gene regulatory pathways(1, 2). As such,  
measuring gene expression *in vivo* is central to our understanding of TB disease control and  
progression(3).

50 RNA-seq provides a sensitive method for global gene expression analysis. Specific for infection  
biology, dual RNA-seq methods have allowed simultaneous profiling of host and pathogen RNA.  
52 However, the striking excess of eukaryotic over bacteria RNA limits the coverage of pathogen transcripts  
in dual RNA-seq studies(4-8), and methods to partially enrich for bacterial transcripts have had limited  
54 success(9, 10). It is clear more sensitive approaches are needed to profile the transcriptional state of the  
pathogen during infection, especially *in vivo*.

56 To improve the coverage of pathogen transcripts, we made use of biotinylated oligonucleotide  
baits that are complementary to the pathogen transcriptome. The baits are hybridized to mixed host-  
58 pathogen RNA and used to enrich pathogen transcripts for sequencing. We applied our pathogen-  
sequencing (Path-seq) method to explore transcriptional changes in MTB following infection in mice.  
60 Here Path-seq has led to discovery that MTB transcriptionally regulate mycolic acids during infection of  
host cells, influencing virulence and persistence of the pathogen.

62

**RESULTS and DISCUSSION**

64

**Development of Path-seq**

66 To enrich the bacterial pathogen transcripts, we used Agilent eArray(11) to create a custom bait library  
that covers all MTB transcripts at even intervals. Our MTB library contains 35,624 probes, each with  
68 biotinylated oligonucleotides of 120 base lengths. The bait library composition is modular and can be  
designed to cover specific transcripts of interest. Similarly, transcripts such as rRNA can be excluded or  
70 gene sequences altered for polymorphisms found in clinical strains(12). For this study, we chose all  
transcripts of MTB H37Rv for complete coverage and comparison to standard RNA-seq results.

72 To assess enrichment of pathogen transcripts, we first used RNA isolated from murine bone  
marrow derived macrophages (BMDMs) spiked with 0.1% MTB RNA. A typical mammalian cell  
74 contains on the order of 20 picograms of RNA, which is roughly two orders of magnitude more than a  
single bacterial cell(13). Accounting for BMDMs that might not be infected and based on intracellular  
76 sequencing studies from literature(4, 8), we estimated 0.1% pathogen RNA would be representative of a  
typical *in vitro* infection. We performed double rRNA depletion using Illumina Ribo-Zero Gold  
78 Epidemiology Kit and used the SureSelect protocol to generate strand-specific libraries for sequencing.  
Half of the library was then indexed for sequencing as the “RNA-seq” sample and the other was  
80 hybridized to the probes, amplified and indexed as the “Path-seq” sample (Fig. 1A). We performed three  
replicate experiments of the mock infection using the same MTB RNA. With the probe hybridization, the  
82 percentages of reads aligned to MTB were increased up to 840-fold. Both the normalized read counts  
(Fig. 1B) and enrichment efficiency (inset Fig. 1B) were highly reproducible across three replicate  
84 samples. Repeating the Path-seq method with spiked RNA samples, we increased the proportion of

86 macrophage RNA and were able to quantify MTB transcripts from one millionth of the host RNA (1.75% of all reads aligned to MTB genomes).

88 To validate the enrichment protocol yielded quantitatively reliable read counts, we investigated the correlation between the RPKMs obtained from the sequencing of RNA from *in vitro* grown MTB, without enrichment (RNA-seq), and the RPKM values obtained with the enrichment protocol (Path-seq) using the same 0.1% MTB RNA with host RNA (BMDMs). Even using different library preparation kits (Illumina for RNA-seq and Agilent for Path-seq), the correlation of RPKMs was 0.92-0.93 (**Fig. 1C**), demonstrating the enrichment process was efficient and accurate for gene expression analysis.

#### 94 **Analysis of MTB transcriptome during *in vivo* infection using Path-seq method**

96 Little is known about the transcriptional state of the pathogen during infection of animal models(14); technical challenges have limited these studies. Given the enrichment capabilities of the Path-seq method, we evaluated the use of the approach to study the transcriptome of MTB isolated from alveolar macrophages (AMs) of infected mice. Using fluorescence-activated cell sorting (FACS) and gating strategies to isolate AMs from bronchoalveolar lavage (BAL) of mice infected with mEmerald-expressing MTB, we determined 2% of AMs were infected with MTB at 24 h post infection (data not shown). We isolated AMs from BAL, instead of whole lung tissue, to avoid the harsh digestion step at 37 °C that can alter the transcriptional state of the cells. However, the 2% infected AM population from BAL was limiting for successful RNA extraction. Therefore, we isolated the entire AM population (i.e., infected and bystanders), relying on the Path-seq method to enrich the MTB transcripts, all of which come from intracellular bacteria. RNA extracted from  $\sim 2 \times 10^5$  AMs (infected and bystanders) in BAL of 10 mice yielded  $\sim 100$   $\mu$ g of total RNA. Therefore, we first evaluated the Path-seq method using 0.3  $\mu$ g of BMDM RNA spiked with 0.005% MTB RNA, as an estimate of an *in vivo* AM infection. We sequenced two replicates and alignment analysis revealed the percentages of reads that aligned to MTB were 38% and 27%, an approximate 1,000-fold enrichment.

110 After evaluating the Path-seq methods feasibility for *in vivo* MTB transcriptome analysis, we used flow cytometry to isolate  $\sim 6 \times 10^5$  AMs (average of 4.3% of all cells and 83.1% of live, CD45+ cells) in BAL of mice 24 h after infection with wild-type MTB (**Fig. S1A**). Infection, FACS-sorting, and RNA extraction was repeated with three animal groups (**Fig. S1B**), yielding an average  $\sim 300$   $\mu$ g total RNA from 30 pooled mice. The Path-seq enrichment was performed and resulted in 17%, 8% and 5% of the entire reads aligning to MTB. We compared the MTB read counts between the *in vivo* samples and extracellular samples grown in media for 24 h, also processed by Path-seq. While the percentage of non-zero reads and total read counts are lower in the *in vivo* samples, the mean count per gene and noise are the same between the two conditions (**Table S1**). This gives us confidence that for genes with detectable reads, we are measuring real expression levels. For differential expression analysis, we excluded any genes with zero counts in all replicates, resulting in 3,505 genes (62%) for comparison between *in vivo* and extracellular MTB. We also analyzed a reduced gene set that excluded genes with zero counts in any replicate, resulting in 1057 genes (20%). Differential expression analysis between *in vivo* intracellular MTB and extracellular MTB, identified 431 differentially expressed genes ( $\log_2$  fold change  $< -1.0$  or  $> 1.0$  and multiple hypothesis corrected  $P$ -value  $< 0.05$ ) from the more stringent gene set (**Data S1**).

126 Among the most upregulated genes *in vivo* compared to control, were genes encoding aerobic fatty acid desaturases, *desA1* (*Rv0824c*) and *desA2* (*Rv1094*) with  $\log_2$  fold change of 4.0 (multiple hypothesis corrected  $P$ -value =  $3.0 \times 10^{-4}$ ) and 4.7 (adjusted  $P$ -value =  $2.3 \times 10^{-4}$ ), respectively. Transposon mutant screens have determined the essentiality of DesA1 and DesA2 for *in vitro* growth of MTB(15, 16).

130 Moreover, we recently demonstrated the essentiality of the *desA1* homolog (*MSMEG\_5773*) in  
132 *Mycobacterium smegmatis* (MSM)(17). We showed that depletion of DesA1 in a conditional mutant  
134 caused loss of mycolic acid biosynthesis, reduced cell viability, and accumulation of mono-unsaturated  
136 mycolic-acid species consistent with DesA1's role in the desaturation of mycolic acids(17).  
Crystallography studies were unable to obtain soluble DesA1 but revealed that DesA2 is structurally  
related to plant fatty acid desaturases and that unordered properties of the protein indicate a specialized  
role for DesA2(18). More biochemical characterization of the desaturases is needed, but the significant  
up-regulation of *desA1/A2* following *in vivo* infection was interesting and deserved further investigation  
of their transcriptional control.

138

### Genome-wide expression analysis during *in vitro* macrophage infection using Path-seq

140 Several genome-wide expression studies of MTB challenged with various stresses, such as nutrient  
starvation(19), hypoxia(20), and during *in vitro* infection(21), have shown that genes involved in mycolic  
142 acid biosynthesis are generally downregulated. Granted, none of these studies specifically addressed the  
regulation of the mycolic acid desaturases, but this opposes what we observed in the *in vivo* infection  
144 data. Therefore, we used the Path-seq method to study the dynamics of *desA1/A2* expression at higher  
resolution following MTB infection of bone marrow derived macrophages (BMDMs). We isolated  
146 BMDMs and infected them with MTB at a MOI of 10. Infected cells were collected at 2, 8 and 24 h after  
infection along with extracellular MTB grown in standard media as control. Total RNA was extracted,  
148 depleted of rRNA and handled as described above (**Fig. 1A**). All extracellular MTB samples were  
processed by Path-seq as well. For the infection samples, we again split each sample into RNA-seq and  
150 Path-seq fractions to evaluate the enrichment efficiency and to simultaneously obtain both host and  
pathogen transcriptomes (**Fig. S2**). We evaluated the percentage of reads that aligned to MTB, and found  
152 a consistent 100-fold increase in the enriched vs nonenriched samples across replicates and time points  
(**Table 1**). With an average 11 million (M) mapped reads for both intracellular (average 13.4 M) and  
154 extracellular (average 8.8 M) MTB, we obtained >100x coverage and 5,622 unique features (including  
ncRNA, UTRs, etc.).

156 Raw read counts from intracellular and extracellular MTB (all from Path-seq analysis) were used  
to generate a tSNE network. This resulted in a network map with extracellular samples clustered closely  
158 together, distinct from the intracellular samples and according to their time post infection (**Fig. S3A**).  
Biological replicates fell into related groups and demonstrated strong correlation in pairwise comparison  
160 of RPKMs (**Fig. S3B**). Differential expression of intracellular MTB was calculated relative to  
extracellular, at each time point using DESeq2. Overall, there were 746, 945, and 412 significant  
162 differentially expressed (log<sub>2</sub> fold change < -1.0 or > 1.0 and multiple hypothesis adjusted *P*-value <  
0.01) transcripts at the 2, 8, and 24 h post infection time points (**Data S2**). The most upregulated genes at  
164 all time points included genes such as *icl1*, *Rv1129c*, *prpD*, *prpC*, and *fadD19*. The induced expression of  
these genes is consistent with known alteration in lipid metabolism during infection, enhanced activity of  
166 the methylcitrate cycle(22), and genetic evidence that MTB utilizes cholesterol from the host during  
infection(23). These carbon metabolizing genes were also found to be up-regulated in microarray analysis  
168 of MTB infected BMDMs(21), along with a significant overlap of other differentially expressed genes  
between the datasets (multiple hypothesis corrected *P*-value =  $6.6 \times 10^{-24}$  at 2 h and adjusted *P*-value =  
170  $1.5 \times 10^{-12}$  at 24 h). These data demonstrate that the Path-seq method yielded data consistent with published  
transcriptional studies of *in vitro* infected host cells. Importantly, the Path-seq method allows for

172 simultaneous expression analysis of host transcripts and additional pathogen features that are not possible  
173 in microarray studies.

174

### ***desA1* and *desA2* are induced early during *in vitro* macrophage infection**

176 Interestingly, *desA1* and *desA2* were transiently up-regulated at 2 h following MTB infection of BMDMs,  
177 followed by return to levels similar to extracellular MTB at 8 h and 24 h (**Fig. 2A**). This is earlier than the  
178 Path-seq data from AMs, which showed induced expression of the desaturases at 24h after *in vivo*  
179 infection. In fact, we compared all significantly differentially expressed genes between the two infection  
180 models at 24 h and found only a small subset of common genes (59 genes), most of which were up-  
181 regulated in both models (**Fig. S4**). Furthermore, tSNE analysis of both *in vitro* and *in vivo* infection  
182 experiments clusters the AM samples with the controls, separate from the BMDM infected samples (**Fig.**  
183 **2B**). We hypothesize that the strikingly different gene expression profiles between the experimental  
184 infection models reflects heterogeneity in host cells. Huang *et al* recently demonstrated in mice that MTB  
185 has lower bacterial stress in AMs compared to interstitial macrophages at two weeks post infection(24).  
186 The authors theorize that different host macrophage lineages represent different intracellular  
187 environments that are permissive (alveolar macrophages) or restrictive (interstitial macrophages) for  
188 MTB growth(24). Our data also indicate a difference in the MTB transcriptional state from macrophages  
189 of different lineages.

190

### **Systems-level comparison of active MTB regulatory networks illustrates differences between 191 infection models**

192 Given the temporal differences in *desA1* and *desA2* expression between the infection models, we  
193 employed a computational framework to characterize, at systems-scale, the transcriptional differences  
194 between the extracellular and intracellular states for each model. Based on the NetSurgeon algorithm(25),  
195 we evaluated the role of each TF in the observed gene expression changes given a signed transcriptional  
196 network. We constructed a transcriptional network based on ChIP-seq data from overexpression of 178 of  
197 214 TFs in MTB(26). Activating and repressing influences of TFs were inferred from consequence of TF  
198 overexpression on downstream genes(27). Using a data driven transcriptional network of 4,635  
199 interactions, each TF-target gene interaction was weighted according to the multiple hypothesis adjusted  
200 *P*-value from differential expression analysis between intracellular and extracellular conditions. We  
201 calculated a relative score for each TF in conditions simulating deletion or overexpression of the TF.  
202 These simulations prioritized TF activities (low or high) yielding a transcriptome most similar to the  
203 infected state, compared to the control (see **Methods** and summary schematic in **Fig. 3A**). We performed  
204 this analysis for each time point and infection model to identify highly ranked TFs (**Fig. 3B**).

205 From the *in vitro* macrophage infection, many of the TFs had distinct temporal activity, while  
206 others were highly ranked across all time points (**Fig. 3B**). These sustained regulons include DosR, which  
207 is known to contain a set of ~50 genes that are induced in response to multiple signals including hypoxia,  
208 nitrosative stress, and carbon monoxide(28-31). While DosR regulon induction is typically associated  
209 with hypoxic conditions and reactive nitrogen intermediates (RNIs), we observed activation as early as 2  
210 h post infection. Encouragingly, this 2 h induction was also found in the microarray study of MTB  
211 infected macrophages, where high DosR regulon expression was sustained until a striking down-  
212 regulation at Day 8(32). This indicates that the known cues of this regulatory network are present almost  
213 immediately during *in vitro* infection. In addition to DosR, two other TFs had high activity across all time  
214 points, Rv0681 (**Fig. 3C**) and Rv0691c. Interestingly, both are TetR family transcriptional regulators and

216 conserved across all mycobacterial genomes(33), including the drastically reduced *Mycobacterium*  
218 *leprae*. The function of these transcriptional networks is unknown, but suggests their activity is important  
for survival in both environmental and intracellular niches.

Among the TFs with low predicted activity, KstR and KstR2 were found across all time points of  
220 the *in vitro* infection and are known to repress genes required for cholesterol utilization(34). Our analysis  
indicates that deletion of their repressive activity, and increased expression of their target genes, is  
222 important for driving the *in vitro* intracellular transcriptional state. This is consistent with the highly  
expressed cholesterol utilization and methyl citrate cycle genes that we and others have observed(21, 35,  
224 36). Moreover, this emphasizes the importance of altered carbon metabolism and utilization of host-  
derived nutrients as key to MTB *in vitro* intracellular adaptation. Another repressor, Zur (previously  
226 FurB), had low predicted activity across all time points (**Fig. 3D**). Zur downregulates genes involved in  
zinc transport(37). During MTB infection, macrophages overload the phagosome with copper and zinc as  
228 a strategy to poison the pathogen(38). However, through multi-faceted resistance mechanisms we do not  
fully appreciate, MTB is able to protect itself against metal toxicity. Our analysis proposes that reduced  
230 Zur activity, results in increased expression of zinc transport genes which could help with regulating zinc  
levels in MTB during *in vitro* macrophage infection. Interestingly, other regulators of metal content (TFs,  
232 uptake and export) were recently found to be required for *in vitro* intracellular growth by high-content  
imaging of an MTB transposon mutant library(39). Leveraging our Path-seq data, we developed a  
234 systems-level approach that recapitulates known *in vitro* intracellular regulatory networks and prioritizes  
others for further experimental testing.

236 We also applied the same analysis to the *in vivo* expression data (using differentially expressed  
genes in **Data S1**) to identify transcriptional networks involved in MTBs response to animal infection.  
238 Interestingly, we observed very few networks that were active in both infection models. Only Rv0691c  
was highly ranked at 24 h from both AMs and BMDMs (**Fig. 3E**). In our regulatory network, Rv0691c  
240 has ~50 target genes, a subset of which are up- and down-regulated during *in vitro* and *in vivo* infection.  
The genes in the regulon do not categorize into a certain pathway, but our unbiased analysis suggests the  
242 Rv0691c regulon deserves further study for its role in establishing MTB infection both *in vitro* and *in*  
*vivo*.

244

### **Identification of *desA1* and *desA2* transcriptional regulator, Rv0472c, and conserved regulation in *M. smegmatis***

246 Our systems analysis revealed novel and infection-specific regulatory networks. However, none of the  
248 identified regulons included *desA1* or *desA2*. We believe this to be a result of regulon size threshold that  
we implemented to reduce false positives (TFs with at least five targets were considered in this analysis).  
250 Therefore, we used the environment and gene regulatory influence network (EGRIN)(40, 41) model to  
discover regulatory mechanisms controlling the expression of the fatty acid desaturases, which were  
252 significantly up-regulated following MTB infection of mice. The full description of the algorithms used to  
construct the EGRIN model are beyond the scope of this work; readers are encouraged to refer to the  
254 original paper for more detail(42). Briefly, the EGRIN model was constructed through semi-supervised  
biclustering of a compendium of 2,325 transcriptomes assayed during MTB response to diverse  
256 environmental challenges in 53 studies conducted by over 30 different laboratories, guided by  
biologically informative priors and *de novo* cis-regulatory GRE detection for module assignment(42). We  
258 demonstrated that the MTB EGRIN model accurately predicts regulatory interactions in a network of 240  
modules and validated the model with the DNA binding sites and transcriptional targets from

260 overexpressing >150 MTB transcription factors (TFs)(26, 27). Overall, the EGRIN model is sufficiently  
262 predictive to formulate hypotheses of MTB regulatory interactions that respond to various environmental  
264 conditions. From the EGRIN model, we identified both desaturases as belonging to module 276 and with  
266 predicted regulation by Rv0472c (**Fig. 4A**). Module 276 also contains other genes associated with PDIM  
268 biosynthesis and transport. Furthermore, the expression of module genes were found to be significantly  
correlated with Rv0472c expression under conditions related to oxidative stress and re-aeration(40).  
Rv0472c is a TetR-type TF with homology across all mycobacteria, including *M. leprae*(33). When  
overexpressed in MTB, the TF led to significant repression of 15 genes, but only *desA1* and *desA2* had  
significant binding of Rv0472c in their promoter region from ChIP-seq analysis(26, 27).

Given the conservation of Rv0472c across mycobacteria, we hypothesized that overexpression of  
the MSM homolog, should also repress the desaturases in MSM (**Fig. 4A**). We cloned *MSMEG\_0916* into  
an anhydrotetracycline (ATc)-inducible Gateway shuttle vector as previously described for MTB(20, 26),  
and transformed into MSM. We induced expression of *MSMEG\_0916* for 4h and harvested chromatin  
samples for ChIP-seq as well as RNA for transcriptional profiling by RNA-seq. Overexpression of  
*MSMEG\_0916* resulted in 9 significant ChIP peaks ( $P$ -value < 0.01) with a peak score higher than 0.7,  
as analyzed by DuffyNGS ChIP peak calling method (see **Methods**). Among these, were peaks located in  
the promoter of the MSM *desA1* and *desA2* (**Fig. 4B**). Additionally, *MSMEG\_0916* overexpression  
resulted in significant repression of *desA1* and *desA2*, with a log<sub>2</sub> fold change of -1.32 and -1.72,  
respectively, compared to uninduced (**Fig. 4C**). The DNA consensus motifs, generated using MEME and  
DNA-binding data from ChIP-seq, also had significant alignment between Rv0472c and *MSMEG\_0916*  
(**Fig. S5**). The conserved consensus motif is particularly interesting, given that *desA1* and *desA2* are the  
only regulatory targets shared by the TFs.

### 282 **Inducible overexpression of *MSMEG\_0916* or *Rv0472c* causes loss of mycobacterial viability and** 284 **reduction in mycolate biosynthesis**

Motivated by our identification of Rv0472c and *MSMEG\_0916* as controlling the expression of *desA1*  
and *desA2*, we hypothesized that overexpression-mediated repression of the desaturases should also have  
phenotypes similar to the *desA1* knockout that we previously characterized (reduced viability following  
loss of mycolate biosynthesis)(17). We tested the viability of the TF overexpression strains by spotting  
serial ten-fold dilutions of cultures on agar plates with or without ATc. Plates with *MSMEG\_0916* were  
incubated for 1 week and growth patterns indicated that the presence of ATc resulted in a 2-log fold  
reduction in CFU counts (**Fig. 5A**). In comparison, plates containing the parental MSM strain showed no  
change in CFUs with the presence or absence of ATc (**Fig. 5A**). We also observed very limited growth in  
broth culture when *MSMEG\_0916* was induced with ATc (**Fig. S6**). Similar experiments done in  
*Mycobacterium bovis* BCG (BCG) and MTB with Rv0472c overexpression, also resulted in 3-log (**Fig.**  
**5B**) and 4-log (**Fig. S7**) reduction in viability, respectively.

Overexpression of the conserved TF resulted in a loss of mycobacterial viability, due to  
repression of *desA1* and *desA2* and ensuing decrease in mycolic acid biosynthesis. Conditional depletion  
of DesA1 in MSM leads to an intermediate decrease in desaturation prior to complete loss of mycolic  
acids(17). To test for a decrease in mycolic acid biosynthesis, we labeled cultures of *MSMEG\_0916*  
overexpression strain with <sup>14</sup>C acetic acid following growth in the presence or absence of ATc. Thin layer  
chromatography (TLC) analysis of apolar lipids demonstrated that overexpression of *MSMEG\_0916*  
reduced the levels of trehalose dimycolates (TDMs) (**Fig. S8**). We also analyzed methyl esters of mycolic  
acids (MAMEs) obtained from apolar lipids using 2D-argentation TLC analysis, designed to separate

304 each subclass of mycolic acid based on saturation levels. MAMEs analysis revealed an accumulation of  
306 products that migrate identically to our previous observation with DesA1 depletion(17) (**Fig. 5C**) and  
308 most likely correspond to mono-unsaturated mycolates. Similarly, 1D TLC separation of fatty acid methyl  
esters (FAMES) and MAMEs from apolar lipids confirmed the general decrease of MAMEs and an  
310 accumulation of FAMES when Rv0472c is overexpressed in BCG (**Fig. 5D** and densitometric analysis in  
**Fig. S9**). This characteristic profile of total MAMEs inhibition and FAMES accumulation mirrors what is  
312 seen with fatty acid synthase (FAS)-II inhibitors, such as isoniazid(43) and thiolactomycin(44), and  
confirms the involvement of DesA1 and DesA2 in the biosynthesis of mycolic acids and more specifically  
314 with the FAS-II system. Interestingly, in BCG there was no accumulation of mono-unsaturated mycolates  
as those found in MSM upon detailed analysis of MAMEs by 2D-argention TLC (**Fig. S10A** and  
**S10B**). This could be due to key differences in mycolate subclasses between MSM and MTB, particularly  
316 cyclopropane ring formation, which is abundant in MTB but not MSM and requires a precursory  
desaturation event.

## 318 CONCLUSIONS

320 During MTB infection, the bacterium utilizes various mechanisms to ensure its own survival and  
persistence in the host. Mycolates, essential for mycobacterial cell wall rigidity and stability, have been  
322 prime candidates for such virulence factors(45). Mycolic acids not only make up a lipid rich barrier in the  
mycobacterial cell envelope, they also act as potent immunomodulators, driving the pathogenesis of  
324 MTB, primarily as part of the cord factor (TDM)(46, 47). Here, we present evidence that mycolate  
biosynthesis is tightly regulated in response to the intracellular environment. Using our novel Path-seq  
326 method, we observed significantly induced expression of the fatty acid desaturases, *desA1* and *desA2*, 24  
h after MTB infection of mice. We further demonstrated that *desA1* and *desA2* are regulated by Rv0472c  
328 (*MSMEG\_0916*) and that Rv0472c-mediated repression leads to reduced mycolate biosynthesis and loss  
of mycobacterial viability. As DesA1 and DesA2 have been shown to be involved in mycolic acid  
330 biosynthesis via desaturation of the merochain, we have therefore named their transcriptional regulatory  
protein MadR (for Mycolic acid desaturase Regulator).

332 Not much is known about the regulation of mycolic acid biosynthesis apart from two transcription  
factors shown to regulate distinct operons, both containing genes encoding core FAS-II proteins(19, 48).  
334 Studying the regulatory alterations to mycolate subclasses remains an even greater challenge, especially  
during infection. Our studies show that MadR is involved in the *in vivo* and *in vitro* regulation of *desA1*  
336 and *desA2*, aerobic desaturases involved in mycolate merochain desaturation(17). The introduction of  
double bonds in the merochain precedes cyclopropanation and other merochain modifications that are  
338 critical for pathogenic mycobacteria(49-52). Loss of cyclopropanation can lead to hyperinflammatory  
responses and attenuated infection. As the introduction of double bonds in the merochain is required for  
340 subsequent cyclopropanation and other merochain modifications, DesA1 and DesA2 could be drivers of  
both mycolic acid biosynthesis and composition during infection. In other words, MadR driven regulation  
342 not only leads to lower mycolate levels during dormancy, a state when new cell wall material is not  
synthesized, but also altered cyclopropane ring formation by varying desaturation levels, thus affecting  
344 virulence and persistence.

Surprisingly, we observed early (2 h post infection) induced expression of *desA1* and *desA2*  
346 during MTB infection of BMDMs, followed by return to basal levels by 8 h. This is consistent with the



348 reported increased production of TDM within the first 30 min after *in vitro* phagocytosis(53) and suggests  
349 that the desaturases play a role in cell wall modifications that occur in response to intracellular cues.  
350 However, the presence of these cues appears to be different or delayed in AMs from infected mice. The  
351 overall disparity in the transcriptional profile of MTB from BMDMs and AMs is both intriguing and  
352 disturbing. The active MTB networks we identified from BMDMs imply the presence of early and  
353 sustained bacterial stress. However, the induction of these stress-related genes is absent in the  
354 transcriptomes of MTB from AMs, suggesting the bacteria are not experiencing the same type or amount  
355 of stimuli in AMs. These data support recent observations using fluorescent MTB reporter strains,  
356 demonstrating that bacilli in AMs exhibit lower stress and higher bacterial replication than those in  
357 interstitial macrophages(24). Similarly, we hypothesize that MTB responds divergently to macrophages  
358 of different lineages and that AMs present fewer stresses and possibly a more permissive environment  
359 compared to BMDMs. It is also worth mentioning that the data raises some concerns with respect to the  
360 use of BMDMs as an appropriate infection model.

361 The expression dynamics of *desA1* and *desA2* during MTB infection of BMDMs is also mirrored  
362 in RNA-seq data of MTB entering and exiting hypoxia over a 5 day time course (**Fig. 6A**). In this  
363 experiment, we used mass flow controllers to regulate the amount of air and nitrogen (N<sub>2</sub>) gas streaming  
364 into cultures of MTB and achieve a gradual depletion of oxygen over 2 days (**Fig. 6A**). The cultures were  
365 maintained in hypoxia for 2 days by streaming only N<sub>2</sub> then re-aerated over 1 day by a controlled increase  
366 in air flow. During the 2 day oxygen depletion, the expression levels of *desA1* and *desA2* did not change  
367 significantly. However, as soon as the cultures reached hypoxia, the expression of the desaturases  
368 increased for ~5h, followed by a dramatic repression after ~30h of being in hypoxia. Subsequently,  
369 re-aeration of the culture returned *desA1* and *desA2* to basal expression levels (**Fig. 6B**). This data along  
370 with the results described above leads us to propose a model for MadR regulation of *desA1* and *desA2*  
371 transcription as summarized in **Fig. 6C**. Under normal growth conditions, MadR exists in equilibrium  
372 between the free and DNA-bound forms, thus, maintaining basal levels of *desA1* and *desA2* transcripts.  
373 Upon macrophage infection and early hypoxia, equilibrium favors unbound MadR which de-represses  
374 *desA1* and *desA2* transcription and increases mRNA levels. As infection progresses and reaches later  
375 stages of hypoxia, MadR has increased binding affinity in the promoters of *desA1* and *desA2* and  
376 represses their transcription to below basal levels. Ultimately, the MadR regulatory system enables  
377 mycobacteria to efficiently alter mycolate biosynthesis and composition in response to environmental  
378 signals. We suspect the early response to infection (*desA1* and *desA2* up-regulation) increases  
379 desaturation events and allows MTB to fine-tune cyclopropanation and other merochain modifications  
380 that contribute to the establishment of infection. However, mycolate biosynthesis is energetically  
381 expensive and MadR-mediated repression occurs in later stages of infection. The reduction in mycolate  
382 biosynthesis allows MTB to enter dormancy and facilitates long term persistence.

383 The question remains how MadR is able to differentially bind to DNA in response to  
384 environmental changes. In mycobacteria, the other TFs regulating mycolate biosynthesis are modulated  
385 by long chain acyl-CoAs(54-56), proposing a role for these molecules in the modulation of MadR as well.  
386 Similarly, a MadR homolog in *Pseudomonas aeruginosa*, DesT, was shown to have enhanced DNA  
387 binding in the presence of unsaturated acyl-CoAs(57). These studies support the notion that a select acyl-  
388 CoA ligand may control MadR DNA binding affinity (as shown in **Fig. 6C**), and thus the expression of  
389 *desA1* and *desA2*.

390 The characterization of the MadR regulon provides valuable insight for understanding the  
391 evolution of MTB. While we have shown the regulation by MadR is conserved from MSM to MTB, our

392 results also suggest the fatty acid desaturation events and resulting mycolate subclasses have evolved,  
specializing for bacterial survival in the host environment. These findings propose mycobacterial  
394 evolution from saprophyte to pathogen has occurred through the adaptation of ancestral genes and  
regulatory networks to function in the host environment. Ultimately, this study demonstrates the *in vivo*  
396 significance of the desaturases and their regulation by MadR. We believe the Path-seq method, described  
and employed here, offers a sensitive and tractable approach to elucidate the molecular mechanisms used  
398 by MTB during host infection. Our detailed characterization of one such mechanism has revealed that  
modulation of MadR activity can affect mycolate composition as well as mycobacterial viability.  
Accordingly, we have established Path-seq as a powerful tool for uncovering the minimally studied *in*  
400 *vivo* biology of this pathogen and revealed the essentiality of MadR encoded program for cell wall  
remodeling and biosynthesis. As such, we present MadR as a new and important anti-tubercular target.

402

#### 404 **References and Notes:**

- 406 1. J. E. Galan, H. Wolf-Watz, Protein delivery into eukaryotic cells by type III secretion machines. *Nature* **444**, 567-573 (2006).
- 408 2. R. Medzhitov, TLR-mediated innate immune recognition. *Semin Immunol* **19**, 1-2 (2007).
3. J. L. Flynn, J. Chan, P. L. Lin, Macrophages and control of granulomatous inflammation in  
410 tuberculosis. *Mucosal Immunol* **4**, 271-278 (2011).
4. A. J. Westermann *et al.*, Dual RNA-seq unveils noncoding RNA functions in host-pathogen  
412 interactions. *Nature* **529**, 496-501 (2016).
5. R. A. Rienksma *et al.*, Comprehensive insights into transcriptional adaptation of intracellular  
414 mycobacteria by microbe-enriched dual RNA sequencing. *BMC Genomics* **16**, 34 (2015).
6. R. Avraham *et al.*, Pathogen Cell-to-Cell Variability Drives Heterogeneity in Host Immune  
416 Responses. *Cell* **162**, 1309-1321 (2015).
7. A. J. Westermann, S. A. Gorski, J. Vogel, Dual RNA-seq of pathogen and host. *Nat Rev Microbiol*  
418 **10**, 618-630 (2012).
8. R. Avraham *et al.*, A highly multiplexed and sensitive RNA-seq protocol for simultaneous analysis  
420 of host and pathogen transcriptomes. *Nat Protoc* **11**, 1477-1491 (2016).
9. M. S. Humphrys *et al.*, Simultaneous transcriptional profiling of bacteria and their host cells.  
422 *PLoS One* **8**, e80597 (2013).
10. C. H. Mavromatis *et al.*, The co-transcriptome of uropathogenic *Escherichia coli*-infected mouse  
424 macrophages reveals new insights into host-pathogen interactions. *Cell Microbiol* **17**, 730-746  
(2015).
- 426 11. J. G. Ong, A.; Joshi, S.; Ravi, H.; Pabon-Pena, C.; Novak, B.; Visitacion, M.; Hamady, M.; Useche,  
F.; Arezi, B.; Buehler, B.; Lin, E.; Hunt, S.; Roberts, D.; Happe, S.; Leproust, E., Overview of Agilent  
428 Technologies SureSelect Target Enrichment System. *Journal of Biomelecular Techniques* **22**, S30-  
S31 (2011).
- 430 12. R. D. Fleischmann *et al.*, Whole-genome comparison of *Mycobacterium tuberculosis* clinical and  
laboratory strains. *J Bacteriol* **184**, 5479-5490 (2002).
- 432 13. B. B. Alberts, C.; Lewis, J.; Raff, M.; Roberts, K.; Watson, J.D., Molecular Biology of the Cell, 3rd  
Edition. *Garland Publishing, New York*, (1994).
- 434 14. A. M. Talaat, R. Lyons, S. T. Howard, S. A. Johnston, The temporal expression profile of  
*Mycobacterium tuberculosis* infection in mice. *Proc Natl Acad Sci U S A* **101**, 4602-4607 (2004).

- 436 15. C. M. Sassetti, D. H. Boyd, E. J. Rubin, Genes required for mycobacterial growth defined by high  
density mutagenesis. *Mol Microbiol* **48**, 77-84 (2003).
- 438 16. J. E. Griffin *et al.*, High-resolution phenotypic profiling defines genes essential for mycobacterial  
growth and cholesterol catabolism. *PLoS Pathog* **7**, e1002251 (2011).
- 440 17. A. Singh *et al.*, Identification of a Desaturase Involved in Mycolic Acid Biosynthesis in  
Mycobacterium smegmatis. *PLoS One* **11**, e0164253 (2016).
- 442 18. D. H. Dyer, K. S. Lyle, I. Rayment, B. G. Fox, X-ray structure of putative acyl-ACP desaturase  
DesA2 from Mycobacterium tuberculosis H37Rv. *Protein Sci* **14**, 1508-1517 (2005).
- 444 19. S. Jamet *et al.*, Evolution of Mycolic Acid Biosynthesis Genes and Their Regulation during  
Starvation in Mycobacterium tuberculosis. *J Bacteriol* **197**, 3797-3811 (2015).
- 446 20. J. E. Galagan *et al.*, The Mycobacterium tuberculosis regulatory network and hypoxia. *Nature*  
**499**, 178-183 (2013).
- 448 21. K. H. Rohde, R. B. Abramovitch, D. G. Russell, Mycobacterium tuberculosis invasion of  
macrophages: linking bacterial gene expression to environmental cues. *Cell Host Microbe* **2**, 352-  
450 364 (2007).
- 452 22. E. J. Munoz-Elias, A. M. Upton, J. Cherian, J. D. McKinney, Role of the methylcitrate cycle in  
Mycobacterium tuberculosis metabolism, intracellular growth, and virulence. *Mol Microbiol* **60**,  
1109-1122 (2006).
- 454 23. A. K. Pandey, C. M. Sassetti, Mycobacterial persistence requires the utilization of host  
cholesterol. *Proc Natl Acad Sci U S A* **105**, 4376-4380 (2008).
- 456 24. L. Huang, E. V. Nazarova, S. Tan, Y. Liu, D. G. Russell, Growth of Mycobacterium tuberculosis in  
vivo segregates with host macrophage metabolism and ontogeny. *J Exp Med* **215**, 1135-1152  
458 (2018).
- 460 25. D. G. Michael *et al.*, Model-based transcriptome engineering promotes a fermentative  
transcriptional state in yeast. *Proc Natl Acad Sci U S A* **113**, E7428-E7437 (2016).
- 462 26. K. J. Minch *et al.*, The DNA-binding network of Mycobacterium tuberculosis. *Nat Commun* **6**,  
5829 (2015).
- 464 27. T. R. Rustad *et al.*, Mapping and manipulating the Mycobacterium tuberculosis transcriptome  
using a transcription factor overexpression-derived regulatory network. *Genome Biol* **15**, 502  
(2014).
- 466 28. H. D. Park *et al.*, Rv3133c/dosR is a transcription factor that mediates the hypoxic response of  
Mycobacterium tuberculosis. *Mol Microbiol* **48**, 833-843 (2003).
- 468 29. S. L. Kendall *et al.*, The Mycobacterium tuberculosis dosRS two-component system is induced by  
multiple stresses. *Tuberculosis (Edinb)* **84**, 247-255 (2004).
- 470 30. D. M. Roberts, R. P. Liao, G. Wisedchaisri, W. G. Hol, D. R. Sherman, Two sensor kinases  
contribute to the hypoxic response of Mycobacterium tuberculosis. *J Biol Chem* **279**, 23082-  
472 23087 (2004).
- 474 31. A. Kumar *et al.*, Heme oxygenase-1-derived carbon monoxide induces the Mycobacterium  
tuberculosis dormancy regulon. *J Biol Chem* **283**, 18032-18039 (2008).
- 476 32. K. H. Rohde, D. F. Veiga, S. Caldwell, G. Balazsi, D. G. Russell, Linking the transcriptional profiles  
and the physiological states of Mycobacterium tuberculosis during an extended intracellular  
infection. *PLoS Pathog* **8**, e1002769 (2012).
- 478 33. R. J. Balhana, A. Singla, M. H. Sikder, M. Withers, S. L. Kendall, Global analyses of TetR family  
transcriptional regulators in mycobacteria indicates conservation across species and diversity in  
480 regulated functions. *BMC Genomics* **16**, 479 (2015).
- 482 34. S. L. Kendall *et al.*, Cholesterol utilization in mycobacteria is controlled by two TetR-type  
transcriptional regulators: kstR and kstR2. *Microbiology* **156**, 1362-1371 (2010).

35. S. Homolka, S. Niemann, D. G. Russell, K. H. Rohde, Functional genetic diversity among  
484 Mycobacterium tuberculosis complex clinical isolates: delineation of conserved core and  
lineage-specific transcriptomes during intracellular survival. *PLoS Pathog* **6**, e1000988 (2010).
- 486 36. D. Schnappinger *et al.*, Transcriptional Adaptation of Mycobacterium tuberculosis within  
Macrophages: Insights into the Phagosomal Environment. *J Exp Med* **198**, 693-704 (2003).
- 488 37. A. Maciag *et al.*, Global analysis of the Mycobacterium tuberculosis Zur (FurB) regulon. *J*  
*Bacteriol* **189**, 730-740 (2007).
- 490 38. O. Neyrolles, F. Wolschendorf, A. Mitra, M. Niederweis, Mycobacteria, metals, and the  
macrophage. *Immunol Rev* **264**, 249-263 (2015).
- 492 39. A. K. Barczak *et al.*, Systematic, multiparametric analysis of Mycobacterium tuberculosis  
intracellular infection offers insight into coordinated virulence. *PLoS Pathog* **13**, e1006363  
494 (2017).
40. E. J. Peterson *et al.*, A high-resolution network model for global gene regulation in  
496 Mycobacterium tuberculosis. *Nucleic acids research* **42**, 11291-11303 (2015).
41. P. E. Turkarslan S, Rustad TR, Minch KJ, Reiss DJ, Morrison R, Ma S, Price ND, Sherman DR, Baliga  
498 NS, A comprehensive map of genome-wide gene regulation in Mycobacterium tuberculosis. *Sci*  
*Data* **2:150010**, (2015).
- 500 42. D. J. Reiss, N. S. Baliga, R. Bonneau, Integrated biclustering of heterogeneous genome-wide  
datasets for the inference of global regulatory networks. *BMC Bioinformatics* **7**, 280 (2006).
- 502 43. C. Vilcheze *et al.*, Inactivation of the inhA-encoded fatty acid synthase II (FASII) enoyl-acyl carrier  
protein reductase induces accumulation of the FASI end products and cell lysis of  
504 Mycobacterium smegmatis. *J Bacteriol* **182**, 4059-4067 (2000).
44. L. Kremer *et al.*, Thiolactomycin and related analogues as novel anti-mycobacterial agents  
506 targeting KasA and KasB condensing enzymes in Mycobacterium tuberculosis. *J Biol Chem* **275**,  
16857-16864 (2000).
- 508 45. C. E. Barry, 3rd *et al.*, Mycolic acids: structure, biosynthesis and physiological functions. *Prog*  
*Lipid Res* **37**, 143-179 (1998).
- 510 46. V. Nataraj *et al.*, Mycolic acids: deciphering and targeting the Achilles' heel of the tubercle  
bacillus. *Mol Microbiol* **98**, 7-16 (2015).
- 512 47. H. Marrakchi, M. A. Laneelle, M. Daffe, Mycolic acids: structures, biosynthesis, and beyond.  
*Chem Biol* **21**, 67-85 (2014).
- 514 48. V. Salzman *et al.*, Transcriptional regulation of lipid homeostasis in mycobacteria. *Mol Microbiol*  
**78**, 64-77 (2010).
- 516 49. M. S. Glickman, J. S. Cox, W. R. Jacobs, Jr., A novel mycolic acid cyclopropane synthetase is  
required for cording, persistence, and virulence of Mycobacterium tuberculosis. *Mol Cell* **5**, 717-  
518 727 (2000).
50. V. Rao, N. Fujiwara, S. A. Porcelli, M. S. Glickman, Mycobacterium tuberculosis controls host  
520 innate immune activation through cyclopropane modification of a glycolipid effector molecule. *J*  
*Exp Med* **201**, 535-543 (2005).
- 522 51. V. Rao, F. Gao, B. Chen, W. R. Jacobs, Jr., M. S. Glickman, Trans-cyclopropanation of mycolic  
acids on trehalose dimycolate suppresses Mycobacterium tuberculosis -induced inflammation  
524 and virulence. *J Clin Invest* **116**, 1660-1667 (2006).
52. D. Barkan, D. Hedhli, H. G. Yan, K. Huygen, M. S. Glickman, Mycobacterium tuberculosis lacking  
526 all mycolic acid cyclopropanation is viable but highly attenuated and hyperinflammatory in mice.  
*Infect Immun* **80**, 1958-1968 (2012).
- 528 53. K. Fischer *et al.*, Mycobacterial lysocardiolipin is exported from phagosomes upon cleavage of  
cardiolipin by a macrophage-derived lysosomal phospholipase A2. *J Immunol* **167**, 2187-2192  
530 (2001).

- 532 54. Y. T. Tsai, V. Salzman, M. Cabruja, G. Gago, H. Gramajo, Role of long-chain acyl-CoAs in the  
regulation of mycolic acid biosynthesis in mycobacteria. *Open Biol* **7**, (2017).
- 534 55. R. K. Biswas *et al.*, Identification and characterization of Rv0494: a fatty acid-responsive protein  
of the GntR/FadR family from Mycobacterium tuberculosis. *Microbiology* **159**, 913-923 (2013).
- 536 56. S. Mondino, G. Gago, H. Gramajo, Transcriptional regulation of fatty acid biosynthesis in  
mycobacteria. *Mol Microbiol* **89**, 372-387 (2013).
- 538 57. Y. M. Zhang, K. Zhu, M. W. Frank, C. O. Rock, A Pseudomonas aeruginosa transcription factor  
that senses fatty acid structure. *Mol Microbiol* **66**, 622-632 (2007).
- 540 58. S. Jaini *et al.*, Transcription Factor Binding Site Mapping Using ChIP-Seq. *Microbiol Spectr* **2**,  
(2014).
- 542 59. M. Vignali *et al.*, NSR-seq transcriptional profiling enables identification of a gene signature of  
Plasmodium falciparum parasites infecting children. *J Clin Invest* **121**, 1119-1129 (2011).
- 544 60. B. Langmead, S. L. Salzberg, Fast gapped-read alignment with Bowtie 2. *Nat Methods* **9**, 357-359  
(2012).
- 546 61. M. I. Love, W. Huber, S. Anders, Moderated estimation of fold change and dispersion for RNA-  
seq data with DESeq2. *Genome Biol* **15**, 550 (2014).
- 548 62. R. Breitling, P. Armengaud, A. Amtmann, P. Herzyk, Rank products: a simple, yet powerful, new  
method to detect differentially regulated genes in replicated microarray experiments. *FEBS Lett*  
**573**, 83-92 (2004).
- 550 63. V. G. Tusher, R. Tibshirani, G. Chu, Significance analysis of microarrays applied to the ionizing  
radiation response. *Proc Natl Acad Sci U S A* **98**, 5116-5121 (2001).
- 552 64. M. D. Robinson, G. K. Smyth, Small-sample estimation of negative binomial dispersion, with  
applications to SAGE data. *Biostatistics* **9**, 321-332 (2008).
- 554 65. P. S. Dehal *et al.*, MicrobesOnline: an integrated portal for comparative and functional  
genomics. *Nucleic Acids Res* **38**, D396-400 (2010).
- 556 66. T. L. Bailey, C. Elkan, Fitting a mixture model by expectation maximization to discover motifs in  
biopolymers. *Proc Int Conf Intell Syst Mol Biol* **2**, 28-36 (1994).
- 558 67. G. M. Dobson, D.E.; Minnikin, S.M.; Parlett, M.; Goodfellow, M.; Ridell, M.; et al., in *Chemical  
Methods in Bacterial Systematics*. (Academic Press, London, 1985), chap. 237, pp. 237-265.
- 560 68. L. Kremer *et al.*, Mycolic acid biosynthesis and enzymic characterization of the beta-ketoacyl-  
ACP synthase A-condensing enzyme from Mycobacterium tuberculosis. *Biochem J* **364**, 423-430  
(2002).
- 562 69. S. Gupta, J. A. Stamatoyannopoulos, T. L. Bailey, W. S. Noble, Quantifying similarity between  
564 motifs. *Genome Biol* **8**, R24 (2007).

566 **Acknowledgements:** We thank members of the Baliga, Bhatt and Aderem labs for critical discussions;  
568 Albel Singh for help with graphics; David Sherman and lab for generating the overexpression system and  
MTB Rv0472c overexpression data.

570 **Funding:** Funding was provided by the National Science Foundation [1518261]; Biotechnology and  
572 Biological Sciences Research Council [BB/N01314X/1]; National Institute of Allergy and Infectious  
Diseases of the National Institutes of Health [R01 AI128215] and [U 19 AI10676, U19 AI135976];  
574 MIBTP PhD Studentship to CC.

576 **Author contributions:** E.J.R.P, R.B., A.C.R., A.B., and N.S.B. designed research; E.J.R.P, R.B., A.C.R.,  
A.K., M.P., D.M., and C.C. performed research; E.J.R.P and M.A performed computational analyses;  
578 E.J.R.P, R.B., A.C.R., A.B., and N.S.B. analyzed data; and E.J.R.P, R.B., A.B., and N.S.B. wrote the  
paper.

580

**Competing interests:** The authors declare no competing financial interests.

582

**Data and materials availability:** Sequencing data have been deposited in the GEO repository in a  
584 SuperSeries record under accession number GSE116085. Correspondence and requests for materials  
should be addressed to NSB ([nitin.baliga@systemsbiology.org](mailto:nitin.baliga@systemsbiology.org)).

586

### **List of Supplementary Materials:**

588

Materials and Methods

Figures S1-S10

590

Tables S1

Data S1-S2

592

References 58-69 are only cited in the Supplementary Materials.

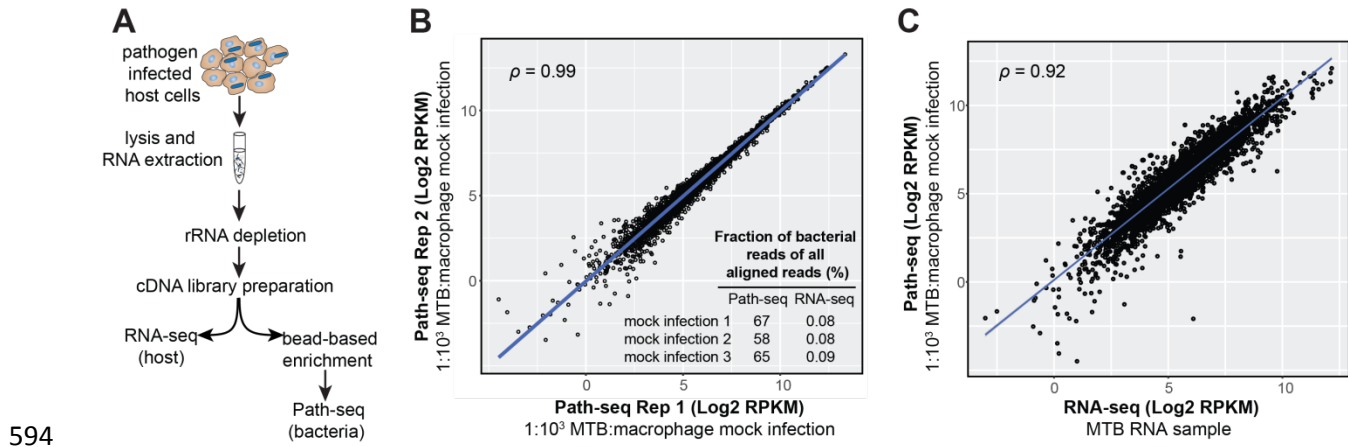

594

**Fig. 1.** Path-seq workflow and validation. (A) Total RNA is extracted from infected cells, 596  
depleted of rRNA, and cDNA libraries prepared. Libraries can then be indexed and sequenced 597  
directly for host transcripts or enriched using pathogen specific oligonucleotides bound to beads. 598  
After hybridization, enriched libraries are indexed, sequenced and reads assigned to host or 599  
pathogen genomes *in silico*. (B) Correlation between replicate mock infections. Path-seq reads 600  
were recovered from samples of macrophage RNA spiked with 0.1% MTB RNA. Scatter plot of 601  
log<sub>2</sub> RPKM values is shown with Pearson correlation,  $P$ -value < 0.0001. Inset summarizes the 602  
mock infection replicates and their fraction of MTB reads (of all aligned reads) from Path-seq 603  
and standard RNA-seq methods. (C) Correlation between MTB RNA sequenced by RNA-seq 604  
(Illumina TruSeq library prep) and the same MTB RNA sample combined with macrophage 605  
RNA at 1:1000 ratio and processed using Path-seq method. Scatter plot of log<sub>2</sub> RPKM values is 606  
shown with Pearson correlation,  $P$ -value < 0.0001.

608

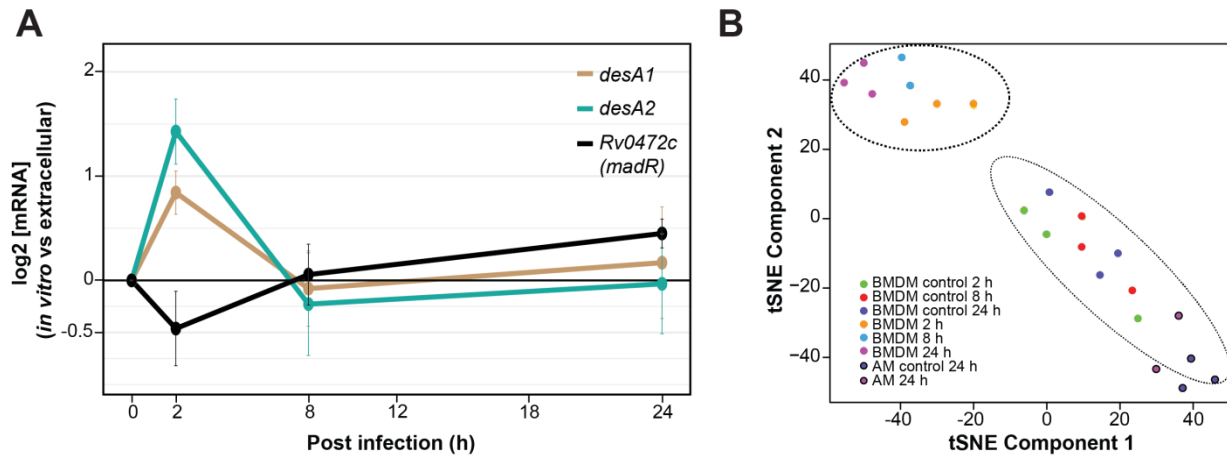

610 **Fig. 2.** Intracellular *desA1* and *desA2* expression levels from Path-seq of MTB infected mouse  
612 AMs (*in vivo*) and BMDMs (*in vitro*). **(A)** Path-seq profiles of *desA1*, *desA2* and *Rv0472c* in  
614 MTB infected BMDMs. Error bars show the standard deviation from three biological samples.  
Representative results from two experiments are presented. **(B)** tSNE analysis of Path-seq data  
from both infection models.



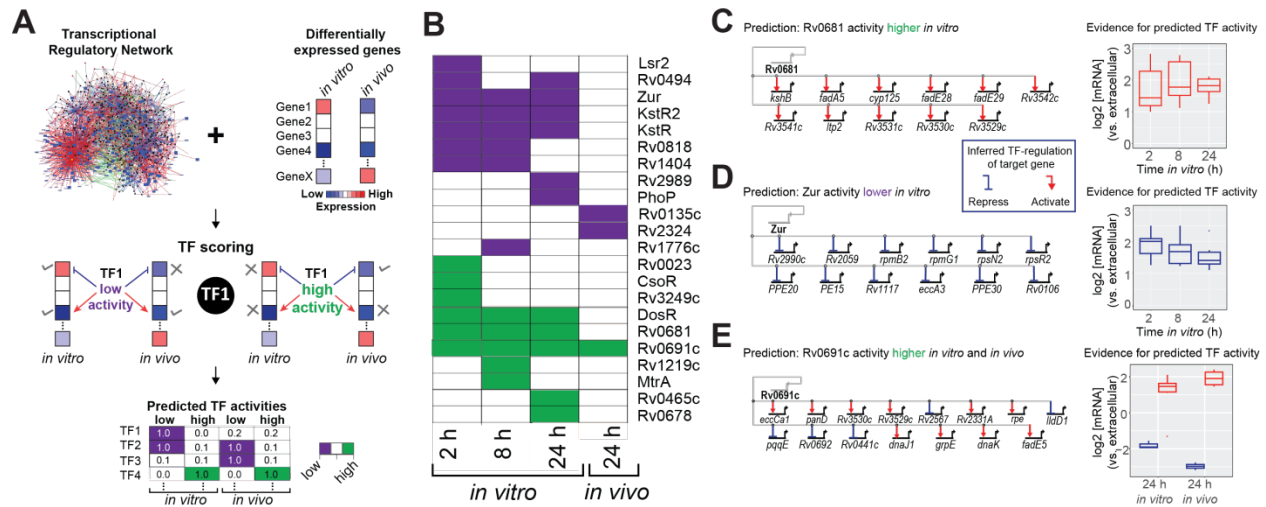

616

**Fig. 3.** Systems approach to identify active intracellular regulatory networks. **(A)** Schematic of network analysis to identify TFs with activity (high or low) in controlling the transcriptional state of MTB during infection of host cells. **(B)** Heatmap of TFs with low (purple) or high (green) activity at specific time points during *in vitro* or *in vivo* infection. **(C)** Rv0681 regulon genes differentially expressed *in vitro* and the evidence for predicted high Rv0681 activity (induced expression of target genes). **(D)** Zur regulon genes differentially expressed *in vitro* and the evidence for predicted low Zur activity (de-represses target genes). **(E)** Rv0691c regulon genes differentially expressed *in vitro* and *in vivo*; evidence for predicted high Rv0691c activity (increased up- and down-regulation of target genes) at 24 h from both *in vitro* and *in vivo* infection.

618

620

622

624

626

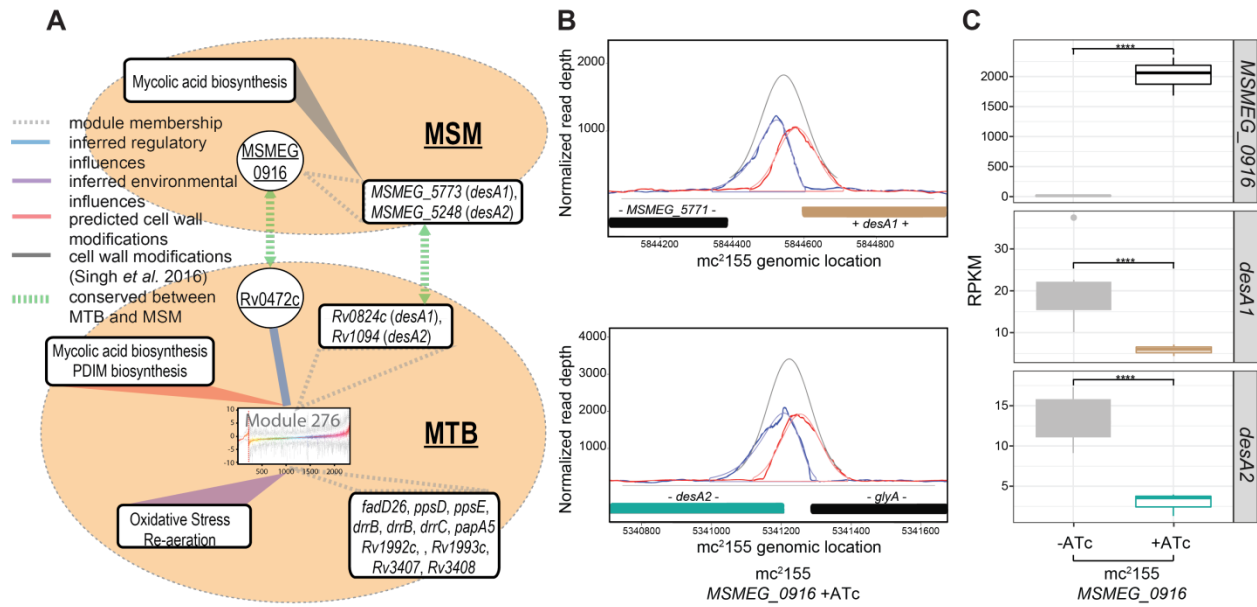

628

**Fig. 4.** Regulation of *desA1* and *desA2* by Rv0472c (*MSMEG\_0916*). (A) Regulatory network model of MTB predicts co-regulation of *desA1* and *desA2* and their transcriptional control by Rv0472c. Graphic representation of linkages between Module 276 genes, regulatory and environmental influences, cell wall modifications, and homology to MSM. (B) Plot of read pile-ups from MSM with inducible overexpression of *MSMEG\_0916* shows ChIP-binding in the promoters of *desA1* and *desA2*. (C) Boxplots representing RPKM values from RNA-seq of MSM with inducible overexpression of *MSMEG\_0916*. Significant log<sub>2</sub> fold change (FC) between uninduced (-ATc) and induced (+ATc) samples for *MSMEG\_0916* (log<sub>2</sub> FC = 4.99), *desA1* (log<sub>2</sub> FC = -1.32) and *desA2* (log<sub>2</sub> FC = -1.72) with multiple hypothesis adjusted *P*-values < 0.0001. Data is from three biological samples.

630

632

634

636

638

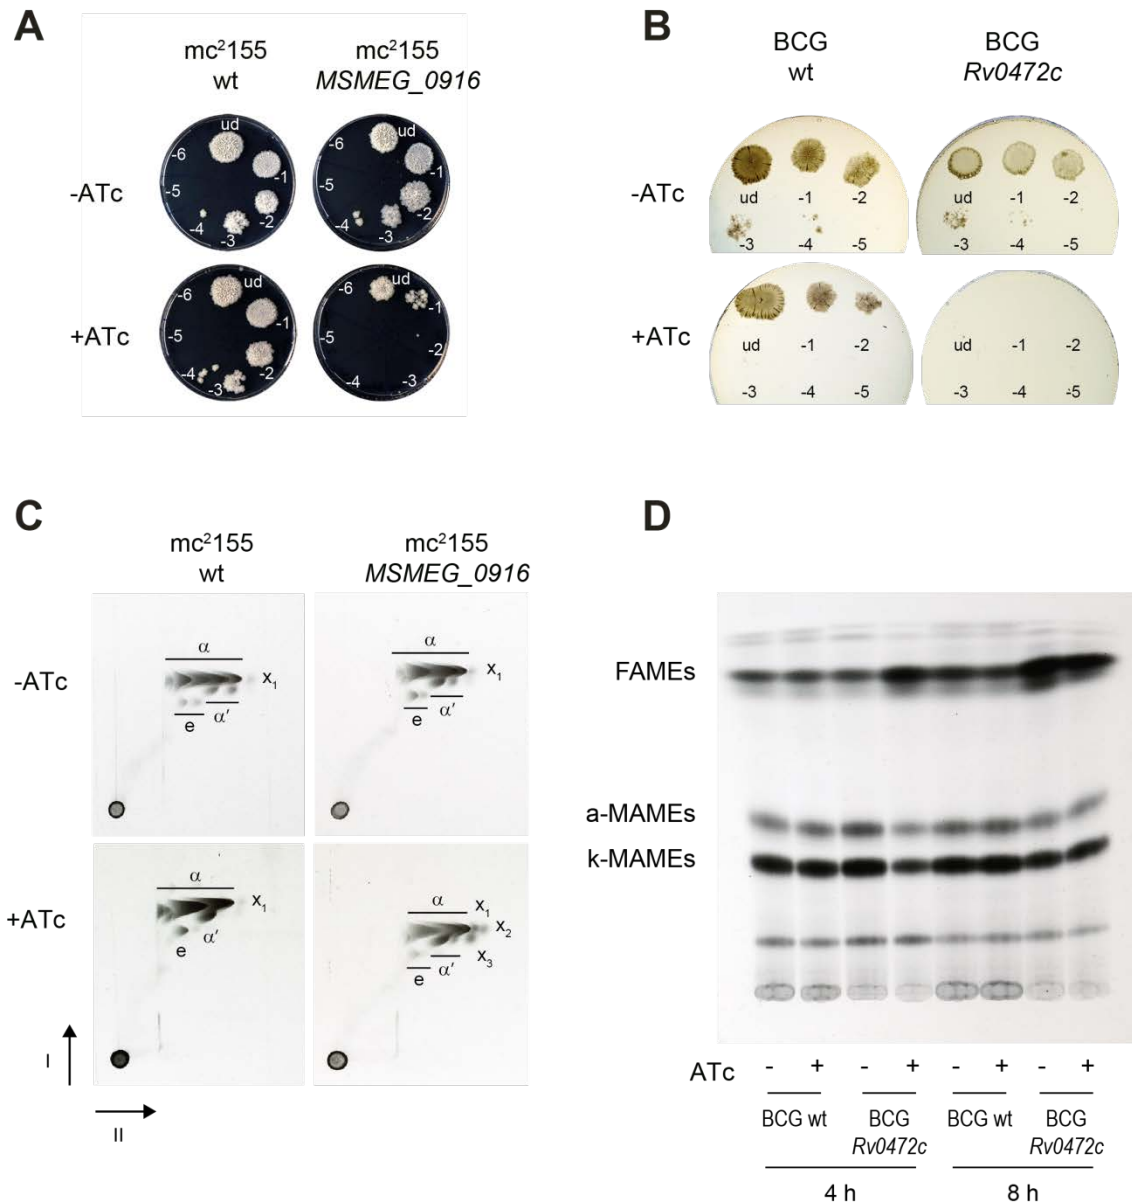

640

**Fig. 5.** Cell viability and mycolic acid characterization. **(A)** Serial ten-fold dilutions of MSM wild type (wt) and MSM with inducible overexpression of *MSMEG\_0916* were spotted on 7H10 agar plates with or without ATc. **(B)** Serial ten-fold dilutions of BCG wt and BCG with inducible overexpression of *Rv0472c* were spotted on 7H10 agar plates with or without ATc. **(C)** Argentation TLC of <sup>14</sup>C-labeled methyl esters of mycolic acids (MAMES) obtained from apolar lipids and delipidated cell wall fractions of MSM wt and MSM with inducible overexpression of *MSMEG\_0916*. The α, α', epoxy (e) and cyclopropanated α- (X<sub>1</sub>) MAMES species are labeled. Faster-migrating species that co-migrated with α-MAMES and accumulate with induced *MSMEG\_0916* overexpression are indicated as X<sub>2</sub> and X<sub>3</sub>. **(D)** BCG wt and BCG with inducible overexpression of *Rv0472c* cultures, labeled with <sup>14</sup>C-acetate, were induced (+ATc) or uninduced (-ATc) for 4 h or 8 h. The total FAMES and MAMES were extracted and analyzed by autoradiography-TLC using equal counts (15,000 cpm) for each lane.

652

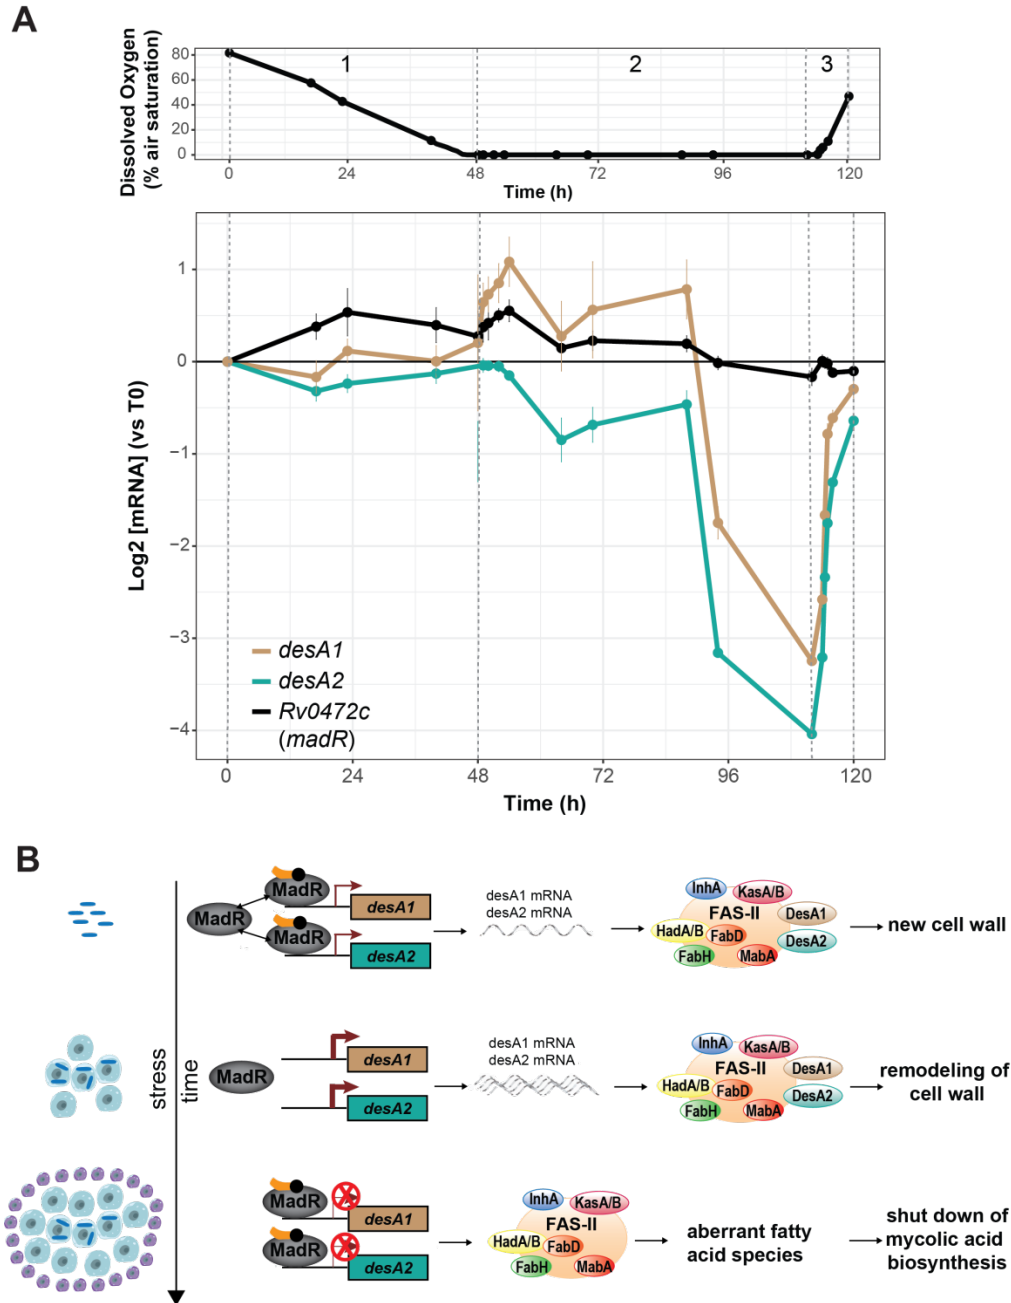

**Fig. 6.** Expression of *desA1*, *desA2* and *Rv0472c* during hypoxia time course and model of MadR regulation of desaturases. (A) Dissolved oxygen curve over 120 h time course showing controlled depletion (1), sustained hypoxia (2) and controlled reaeration (3). Points represent the average of three biological replicates and were measured via fiber optic technology that non-invasively probes oxygen levels in the culture (PreSens Precision Sensing GmbH). (B) Expression profiles (RNA-seq) of *desA1*, *desA2* and *Rv0472c* (*madR*) over the time course and oxygen levels. Error bars show the standard deviation from three biological samples. (C) Under normal growth conditions, MadR exists in equilibrium between the free and DNA-bound forms, and a basal level of *desA1* and *desA2* expression is maintained. DesA1 and DesA2 acts with other enzymes of the fatty acid synthase-II (FAS-II) complex to produce mycolic acids for new

656

658

660

662

664

666 cell wall. Infection of macrophages and early stress cues shifts the equilibrium towards the free  
668 form of MadR and the repression of *desA1* and *desA2* is released. The desaturase protein levels  
670 increase, introducing double bonds that allow cyclopropanation and other modifications to alter  
672 the cell wall. These changes enable the bacteria to withstand intracellular stresses and establish  
infection. As infection continues and stress is sustained, MadR binds tightly to the promoter of  
*desA1* and *desA2*, leading to stringent repression of the desaturases. MadR-mediated repression  
of *desA1* and *desA2* leads to irregular fatty acids of medium length and the pausing of mycolic  
acid biosynthesis to enter into dormancy. The DNA-bound form of MadR is shown in complex  
with a yet unknown co-factor that leads to repression of the desaturases.

674

676

|                     | <b>Fraction of MTB reads of<br/>all aligned reads (%)</b> |                |
|---------------------|-----------------------------------------------------------|----------------|
|                     | <b>Path-seq</b>                                           | <b>RNA-seq</b> |
| Intracellular 2h a  | 77.0                                                      | 0.73           |
| Intracellular 2h b  | 71.1                                                      | 0.53           |
| Intracellular 2h c  | 88.5                                                      | 0.65           |
| Intracellular 8h a  | 47.7                                                      | 0.54           |
| Intracellular 8h b  | 87.5                                                      | 0.66           |
| Intracellular 8h c  | 82.8                                                      | 0.38           |
| Intracellular 24h a | 97.4                                                      | 3.97           |
| Intracellular 24h b | 75.5                                                      | 1.88           |
| Intracellular 24h c | 97.5                                                      | 3.10           |

678

**Table 1.** Mapping statistics from Path-seq or RNA-seq samples of MTB infected BMDMs.

680

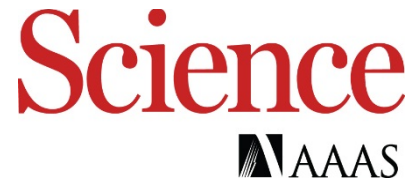

682

684

## Supplementary Materials for

686

### **An essential mycolate remodeling program for mycobacterial adaptation in host cells**

688

Eliza J.R. Peterson, Rebeca Bailo, Alissa C. Rothchild, Mario Arrieta-Ortiz, Amardeep Kaur, Min Pan,  
690 Dat Mai, Charlotte Cooper, Alan Aderem, Apoorva Bhatt, Nitin S. Baliga

692

Correspondence to: [nitin.baliga@systemsbiology.org](mailto:nitin.baliga@systemsbiology.org)

694

#### **This PDF file includes:**

696

Materials and Methods

698

Figs. S1 to S10

Table S1

700

Captions for Data S1 to S2

702

#### **Other Supplementary Materials for this manuscript include the following:**

704

Data S1. DEGs\_invivo.xlsx

Data S2. DEGs\_invitro\_all\_timepoints.xlsx

706

708

## 710 **Materials and Methods**

712 The approaches used in this study include both computational and biological methods. Algorithms  
714 developed for the EGRIN model and the NetSurgeon approach were implemented in the R programming  
language and Python, respectively. Plots were generated using R and images prepared using Adobe  
Illustrator CS5.

716

### Culturing conditions

718 Mycobacteria strains were cultured in Middlebrook 7H9 with the ADC supplement (Difco), 0.05%  
Tween80 at 37°C under aerobic conditions with constant agitation. Strains containing the  
720 anhydrotetracycline (ATc)-inducible expression vector were grown with the addition of 50 µg/mL  
hygromycin B to maintain the plasmid. Growth was monitored by OD600 and colony forming units  
722 (CFUs). For experiments featuring *madR* overexpression strains, overexpression was induced for the  
approximate duration of one cell doubling (18h for MTB and BCG, 4h for MSM) using an ATc  
724 concentration 100 ng/mL culture. Wild-type and overexpression strain cultures were grown into mid-log  
phase. For assessing growth on agar plates, broth cultures were adjusted to OD600 of 0.5, and serial  
726 dilutions were spotted on 7H10 containing 0.5% (v/v) glycerol, and 10% (v/v) OADC plates, with or  
without 100 ng/ml ATc. In the case of the overexpression strain, 50 ng/ml hygromycin was added to the  
728 solid medium. For growth in broth, MSM mid-logarithmic phase cultures containing the integrative  
vector pMV306-eGFP-Zeo were inoculated in an initial OD600 0.05 in 200 µl of 7H9 supplement with  
730 0.2% (v/v) glycerol, 0.05% (v/v) Tween-80 and 10% (v/v) OADC with or without 100 ng/ml ATc in  
sealed 96-well Costar 3603 black sided clear bottomed plate incubated at 37°C. Fluorescence was  
732 acquired every 30 min for 30 hours at 37°C, in a Pherastar FS microtiter plate reader (BMG Labtech),  
using 485 nm and 520 nm as excitation and emission wavelengths, respectively. When growing BCG or  
734 MSM for lipid extraction, cultures were cultured up to OD600 0.5. Then, they were induced with 100  
ng/ml ATc (Sigma-Aldrich) final concentration, and labelled with acetic acid [1-14C] 1 mCi/ml  
736 (PerkinElmer), if hot lipid analysis was going to be performed. MSM samples were collected the  
following day, while BCG cultures at 4 and 8 hours post-induction.

738

### Tissue Culture

740 BMDMs were cultured in RPMI (RPMI containing 10% (v/v) FBS, 2mM L-glutamine) with recombinant  
human CSF-1 (50 ng/mL) for 6 days and then replated. BMDMs were infected on day 7 with MTB  
742 H37Rv strain (MOI 10), followed by washing 3x with RPMI at 2 h post infection. MTB infected BMDMs  
were lysed with TRIzol (Invitrogen) and total RNA was isolated from mixed host-pathogen sample.

### Strains

744 To investigate the growth properties of *MadR* overexpression, we used strains containing an ATc-  
inducible expression vector of the gene, as described previously(20, 26, 27, 58). The pDTCF-  
746 *MSMEG\_0916* plasmid was transformed into *M. smegmatis* mc<sup>2</sup>155. Similarly, pDTCF-*Rv0472c* was  
transformed into *M. bovis* BCG and *M. tuberculosis* H37Rv. The same *M. tuberculosis* H37Rv was used  
748 for Path-seq experiments.

750

### Mice

752 C57BL/6 mice were purchased from the Jackson Laboratory. All mice were housed and bred under  
specific pathogen-free conditions at the Center for Infectious Disease Research (CID Research). All



754 experimental protocols involving animals were approved by the Institutional Animal Care and Use  
755 Committee of CID Research.

756

#### Aerosol Infection

758 A mid log-phase stock of MTB H37Rv was used to infect mice in an aerosol infection chamber (Glas-  
759 Col). Bacterial load in the lungs was determined by plating serial dilutions from homogenized lungs.

#### Cell Isolation, Analysis and Sorting

760 Bronchoalveolar lavage was performed by first exposing the trachea of euthanized mice. The exposed  
761 trachea was punctured using Vannas Micro Scissors (VWR) and 1 mL PBS was injected using a 20G-1”  
762 IV catheter (McKesson) connected to a 1 mL syringe. The PBS was flushed into the lung and aspirated  
763 three times and the recovered fluid was placed in a 15mL tube on ice. The 1 mL PBS wash was then  
764 repeated 3 additional times for a total of 4 mL recovered fluid. Cells were filtered, spun down and  
765 resuspended in a 96-well plate for antibody staining. Cells were suspended in 1X PBS (pH 7.4)  
766 containing 0.01% NaN<sub>3</sub> and 1% fetal bovine serum (i.e. FACS buffer). Fc receptors were blocked with  
767 anti-CD16/32 (2.4G2, BD Pharmingen). Cell viability was assessed using Zombie Violet dye  
768 (Biolegend). Surface staining included antibodies specific for murine Siglec F (E50-2440, BD  
769 Pharmingen), CD11b (M1/70, Biolegend), CD64 (X54-5/7.1, Biolegend), CD45 (104, Biolegend), CD3  
770 (17A2, eBiosciences), and CD19 (1D3, eBiosciences). Cell sorting was performed on a FACS Aria (BD  
771 Biosciences). Cells were collected in complete media, spun down, resuspended in Trizol, and frozen at -  
772 80° overnight prior to RNA isolation.

774

#### RNA isolation

776 Cell pellets in TRIzol were transferred to a tube containing Lysing Matrix B (QBiogene, Inc.), and  
777 vigorously shaken at max speed for 30 s in a FastPrep 120 homogenizer (QBiogene) three times. This  
778 mixture was centrifuged at max speed for 1 min and the supernatant was transferred to a fresh tube. RNA  
779 from extracellular MTB samples, BMDM infection and madR overexpression was isolated using the  
780 Direct-zol RNA MicroPrep kit (Zymol Research) according to manufacturer’s instruction with on-column  
781 DNase treatment. RNA from mice infection was isolated by adding 200 µL chloroform. Samples were  
782 inverted and incubated for 2-3 min and the upper aqueous phase was collected. A second chloroform  
783 extraction was done, followed by addition of 1 µL glycolgen and 500 µL isopropanol. Samples were  
784 incubated with isopropanol for 10m at room temperature, centrifuged and supernatant was discarded.  
785 Pellet was washed with 1 ml 70% ethanol twice. All ethanol was removed, the pellet dried (15m) and  
786 resuspended in 12 µL RNase free water. Total RNA yield was quantified by Nanodrop (Thermo  
787 Scientific) and quality was analyzed in a 2100 Bioanalyzer system (Agilent Technologies). Total RNA  
788 samples were depleted of ribosomal RNA using the Ribo-Zero Gold rRNA Removal Kit “epidemiology”  
(Illumina).

790

#### Probe design

792 Nonoverlapping head-to-tail 120-nucleotide probes were designed using the Array software (Agilent  
793 Technologies). A total of 35,624 probes were designed to cover 3,924 *M. tuberculosis* H37Rv ORFs  
794 (assembly M\_tub\_h37rv\_ASM19595v2\_32\_1). Using Megablast, it was verified that all genes of MTB  
795 were matched by at least one probe and that only a negligible fraction of the probes could be mapped on  
796 the mouse and human cDNA sequences from Ensembl.

798 Preparation of libraries for transcriptional sequencing

RNA libraries for Path-seq were prepared using the SureSelect<sup>XT</sup> strand-specific RNA target enrichment  
800 for Illumina multiplexed sequencing. RNA libraries for RNA-seq were prepared using the SureSelect<sup>XT</sup>  
strand-specific RNA kit, but were not hybridized to probes. Briefly, mRNA was enzymatically  
802 fragmented and double-stranded cDNA was produced with adapters ligated to both ends. The library was  
then amplified using provided primers which hybridize to the previously inserted adapters, therefore  
804 allowing a linear amplification to all transcripts present in the sample. In the case of nonenriched RNA-  
seq samples, sample indexes were also inserted during this PCR. For Path-seq libraries, double-stranded  
806 cDNA ligated to adapters was also amplified and then incubated at 65 C for 24h with the set of  
biotinylated oligonucleotides specifically designed to capture MTB transcripts, as described above. The  
808 hybridized sequences were captured with magnetic streptavidin beads. They were next linearly amplified  
using provided primers and indexed during PCR. Before sequencing, libraries were assessed for quality  
810 and fragment size by Bioanalyzer and with a Qubit fluorometer (Invitrogen) to determine cDNA  
concentration. Resulting libraries were sequenced on the Illumina NextSeq instrument using mid output  
812 150 v2 reagents. Paired-end 75 bp reads were processed following Illumina default quality filtering steps.

814 Transcription abundance from sequencing data

Raw FASTQ read data were processed using the R package DuffyNGS as described  
816 previously(59). Briefly, raw reads pass through a 3-stage alignment pipeline: (i) a prealignment  
stage to filter out unwanted transcripts, such as rRNA, mitochondrial RNA, albumin, and globin;  
818 (ii) a main genomic alignment stage against the genome(s) of interest; and (iii) a splice junction  
alignment stage against an index of standard and alternative exon splice junctions. Reads from  
820 samples of mixed host-pathogen RNA and extracellular MTB controls were aligned to a  
combined *M. tuberculosis H37Rv* (ASM19595v2) and *Mus Musculus* (GRCm38.p6) genome.  
822 Reads from samples of MSM RNA were aligned to *M. smegmatis* mc<sup>2</sup>155 genome  
(ASM1500v1). All alignments were performed with Bowtie2(60), using the command line  
824 option “very-sensitive.” BAM files from stages 2 and 3 are combined into read depth wiggle  
tracks that record both uniquely mapped and multiply mapped reads to each of the forward and  
826 reverse strands of the genome(s) at single-nucleotide resolution. Multiply mapped reads are  
prorated over all highest-quality aligned locations. Gene transcript abundance is then measured  
828 by summing total reads landing inside annotated gene boundaries, expressed as both RPKM and  
raw read counts. Two stringencies of gene abundance are provided using all aligned reads and by  
830 just counting uniquely aligned reads.

832 Differential expression

For both infection models (*in vitro* and *in vivo*), we used DESeq2(61) to identify gene expression  
834 changes between intracellular and extracellular MTB at each sampled time point. We used  
rounded raw read counts estimated by DuffyNGS (as described above) as input for DESeq2.  
836 Genes with absolute log<sub>2</sub> fold change bigger than one and multiple hypothesis adjusted *P*-value  
below 0.01 and 0.05, for the *in vitro* and *in vivo* data, respectively, were considered differentially  
838 expressed.

For *MSMEG\_0916* overexpression, we used a panel of 5 DE tools to identify gene  
840 expression changes between induced (+ATc) and uninduced (-ATc). The tools included (i)  
RoundRobin (in-house); (ii) RankProduct(62); (iii) significance analysis of microarrays  
842 (SAM)(63); (iv) EdgeR(64); and (v) DESeq2(61). Each DE tool was called with appropriate  
default parameters and operated on the same set of transcription results, using RPKM abundance

844 units for RoundRobin, RankProduct, and SAM and raw read count abundance units for DESeq2  
846 and EdgeR. All 5 DE results were then synthesized, by combining gene DE rank positions across  
848 all 5 DE tools. Specifically, a gene's rank position in all 5 results was averaged, using a  
850 generalized mean to the 1/2 power, to yield the gene's final net rank position. Each DE tool's  
852 explicit measurements of differential expression (fold change) and significance (*P*-value) were  
854 similarly combined via appropriate averaging (arithmetic and geometric mean, respectively).  
856 Genes with averaged absolute log<sub>2</sub> fold change bigger than one and multiple hypothesis adjusted  
858 *P*-value below 0.01 were considered differentially expressed.

#### 852 MTB signed transcriptional network

854 We compiled a signed (stating the positive or negative nature of each TF-gene interaction) wiring  
856 diagram of MTB transcriptional regulatory network. The compiled MTB network included 4,635 TF-gene  
858 interactions (2,296 and 2,339 instances of activation and repression, respectively) with both physical  
860 (detected with ChIP-seq experiments) and functional evidence (detected with transcriptional profiling).  
862 The compiled network contained 1,996 genes and 136 TFs with at least one target. The initial ChIP-seq  
864 derived MTB network consisted of 6,581 interactions occurring in the -150bp to +70bp region of genes'  
866 promoter reported by Minch et al.(26). We expanded that MTB ChIP-seq network by taking into account  
operon organizations. For a given TF-gene interaction, if the target gene is part of an operon (according to  
the MicrobesOnline database(65)), we included all other members of the operon as potential targets of the  
corresponding TF. The expanded MTB ChIP-seq network contained 12,188 interactions. Finally, we  
filtered out interactions that did not change at least 20% in the relevant TF-over-expressing strain  
(compared to the WT strain). Up-regulation of the target gene in the TF-over-expressing strain was  
interpreted as positive interaction (the opposite for down-regulation).

#### 868 Identification of transcription factors with differential activity in intracellular MTB

870 We applied the strategy recently proposed by Michael *et al.*(25) (the NetSurgeon algorithm) to identify  
872 potential TFs with an increase or decrease in their regulatory activity in intracellular MTB with respect to  
874 the extracellular controls at each sampled time point. Briefly, we used a signed MTB transcriptional  
876 network model (described above) and the lists of genes identified as differentially expressed by DESeq2  
878 and their computed adjusted *P*-values (described above), to score and rank the contribution of TFs'  
activity to the observed changes in the transcriptional profiles of intracellular MTB. To reduce false  
positives (i.e. misleading presence of TFs with small number of known targets at the top of our TF scores  
ranking) due to overlap between regulons, only TFs with at least five targets were considered in this  
analysis. Furthermore, we considered TFs in the top 15 of NetSurgeon's score ranking as the ones with  
differential activity. We selected this threshold based on empirical analysis in *Escherichia coli*.

#### 880 ChIP-seq

882 The madR overexpression strain was induced for the approximate duration of one cell doubling (4 h for  
884 MSM) using an ATc concentration of 100 ng/ml culture. DNA-protein interactions were characterized as  
886 described previously(26). Libraries were prepared using ThruPLEX DNA-seq Kit (Rubicon) using  
standard protocol. Samples were sequenced on the Illumina 550 NextSeq instrument, generating unpaired  
20-30 million 75-bp reads per sample. Raw FASTQ read data were processed using the R package  
DuffyNGS as described previously(59). For consensus motif determination, we searched for conserved

888 DNA sequences within  $\pm 50$  nucleotides of high quality (score > 0.7) ChIP-seq peak centers using  
MEME(66).

890 Measuring viability of *madR* overexpression strains

892 Wild-type and *madR* overexpression strain cultures were grown into mid-log phase. For assessing growth  
on agar plates, OD of the broth culture was adjusted up to 0.5, and serial dilutions were spotted in 7H10  
894 containing 0.5% (v/v) glycerol, and 10% (v/v) OADC plates, with or without 100 ng/ml ATc. In the case  
of the overexpression strain, 50 ng/ml hygromycin was added to the solid medium.

896 Extraction and analysis of total lipids and mycolic acids

898 Lipids were extracted from BCG and MSM cells in three fractions as describes by Dobson *et al.*(67), with  
a few modifications. Briefly, outside apolar lipids from dried pellets were extracted with two consecutive  
extractions with 4 ml of petroleum ether (60-80C), and dried. Then, inside apolar and polar lipids were  
900 extracted following Dobson protocol.

902 Outside, inside apolar and polar lipid extracts, along with delipidated pellets from MSM and BCG  
were subjected to alkaline hydrolysis using tetrabutylammonium hydroxide (TBAH) as previously  
described(68).

904 Aliquots (15,000 cpm) from each outside, inside apolar and polar lipid extracts were analyzed by  
thin layer chromatography (TLC) utilizing Silica Gel 60 F254 plates (Merck) developed once in the  
906 solvent system  $\text{CHCl}_3/\text{CH}_3\text{OH}/\text{H}_2\text{O}$  (60:16:2, v/v/v). However, FAMES and MAMES aliquots (15,000  
cpm) were resolved through TLC using petroleum ether/acetone (95:5, v/v) or by two-dimensional silver  
908 ion argentation thin layer chromatography (2D-TLC)(68). Autoradiograms were produced after exposing  
Carestream® Kodak® BioMax® MR film for 3 days. To determine the intensity of TLC spots,  
910 densitometric analysis using Adobe Photoshop CC 2015 was performed.

912

914

916

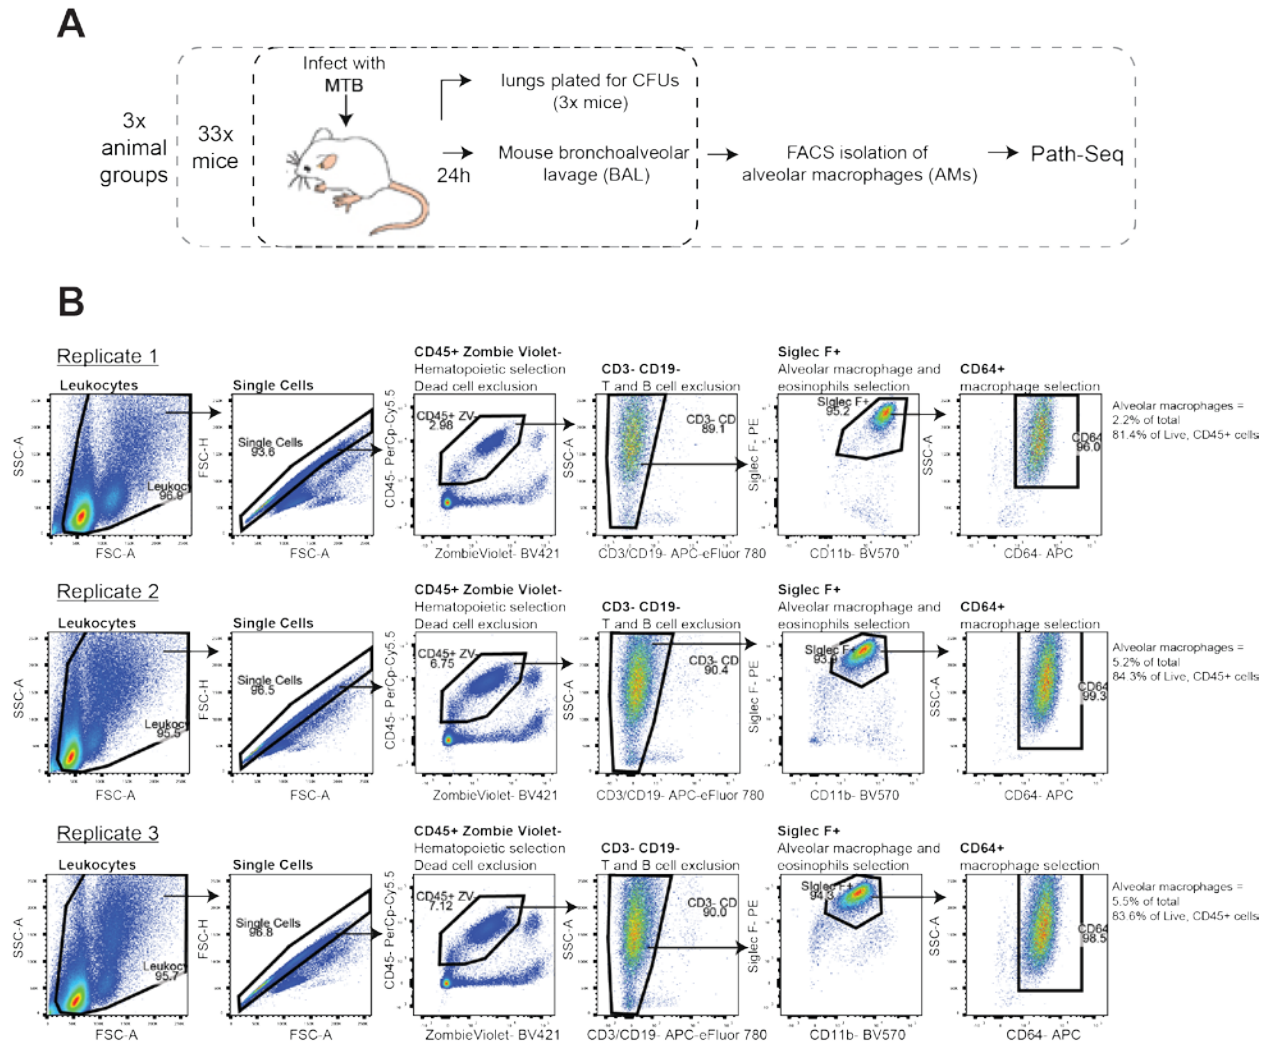

918 **Fig. S1.**  
 920 Isolation of alveolar macrophages from MTB infected mice. (A) Schematic of *in vivo* infection  
 922 using Path-seq method. (B) Flow cytometry analysis to sort alveolar macrophages from BAL of  
 924 wt mice 24 h after aerosol infection of  $6 \times 10^3$  MTB. Cell viability was assessed using Zombie  
 Violet viability dye. Alveolar macrophages were defined as CD45<sup>+</sup>, CD3<sup>-</sup>, CD19<sup>-</sup>, SiglecF<sup>+</sup>,  
 CD11b<sup>mid</sup> and CD64<sup>+</sup>. Plots show the percentages of cells from each parent population for each  
 of the three infection replicates.

926

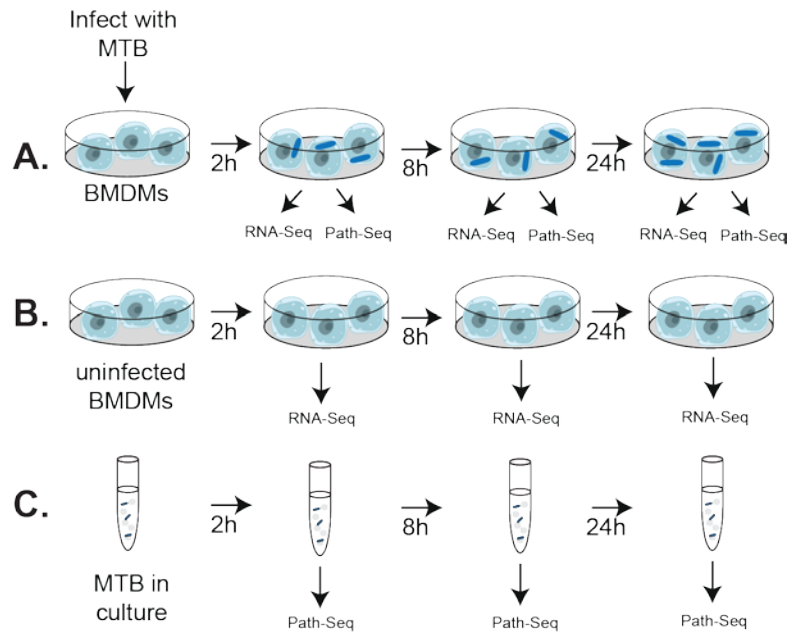

928 **Fig. S2.**  
930 Schematic of *in vitro* infection using Path-seq. (A) Mouse bone marrow derived macrophages (BMDMs)  
931 were infected with MTB H37Rv at MOI of 10. MTB infected BMDMs were lysed with TRIZOL at given  
932 time points and RNA samples were prepared for sequencing by RNA-seq and Path-seq (MTB  
933 enrichment), as described in main text. (B) Uninfected BMDMs were collected as a host control and  
934 processed by RNA-seq. (C) MTB grown in 7H9 broth culture were used as extracellular MTB control and  
processed by Path-seq.

936

938

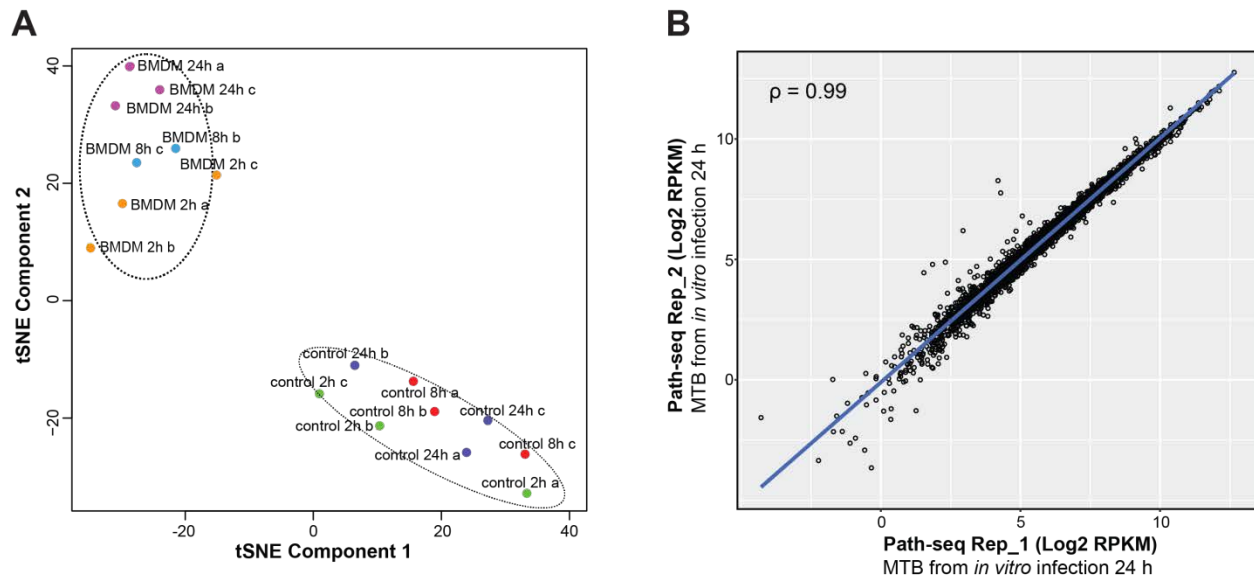

940 **Fig. S3.**

942 Analysis of replicates from *in vitro* infection. (A) tSNE analysis of Path-seq data from *in vitro*  
944 infection samples. MTB from infected bone marrow derived macrophages are labeled as  
“BMDM” and extracellular MTB grown in 7H9 are labeled as “control”. (B) Correlation  
946 between replicates from *in vitro* infection collected at 24 h. Scatter plot of log<sub>2</sub> RPKM values is  
shown with Pearson correlation,  $P$ -value < 0.0001.

946

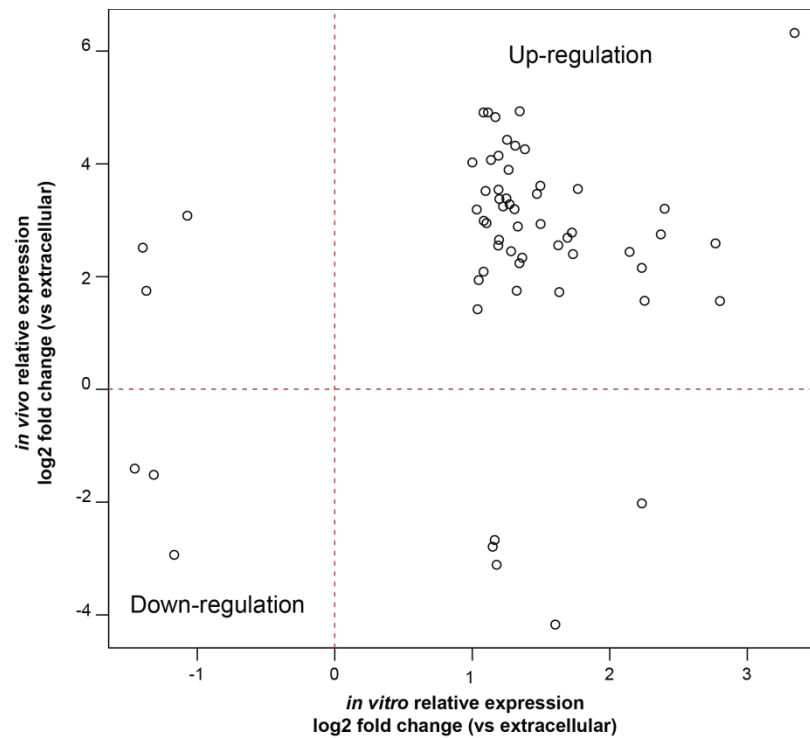

948

**Fig. S4.**

950 Expression of genes that are significantly differentially expressed from both in vitro and in vivo  
952 infection models. Scatter plot of log<sub>2</sub> fold change expression of MTB from infected BMDMs vs  
954 extracellular MTB at 24 h (in vitro) and log<sub>2</sub> fold change of MTB from alveolar macrophages of  
954 MTB infected mice vs extracellular MTB at 24 h. All samples were processed by Path-seq  
method.

956



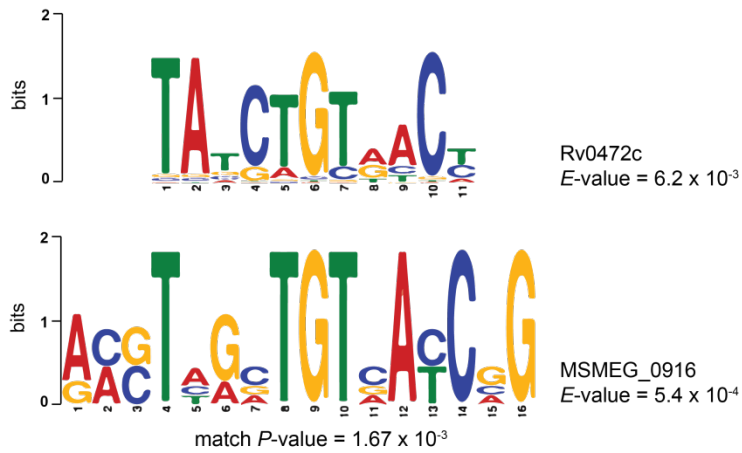

958 **Fig. S5.**

960 Consensus motifs from ChIP-seq peaks of *Rv0472c* overexpressed in MTB (top) and  
962 *MSMEG\_0916* overexpressed in MSM (bottom). For consensus motif determination, we  
964 searched conserved DNA sequences within  $\pm 50$  nucleotides of high quality (score  $> 0.7$ ) ChIP-  
seq peak centers using MEME(66). Alignment of consensus motifs was performed with  
Tomtom(69), match  $P$ -value =  $1.67 \times 10^{-3}$ .

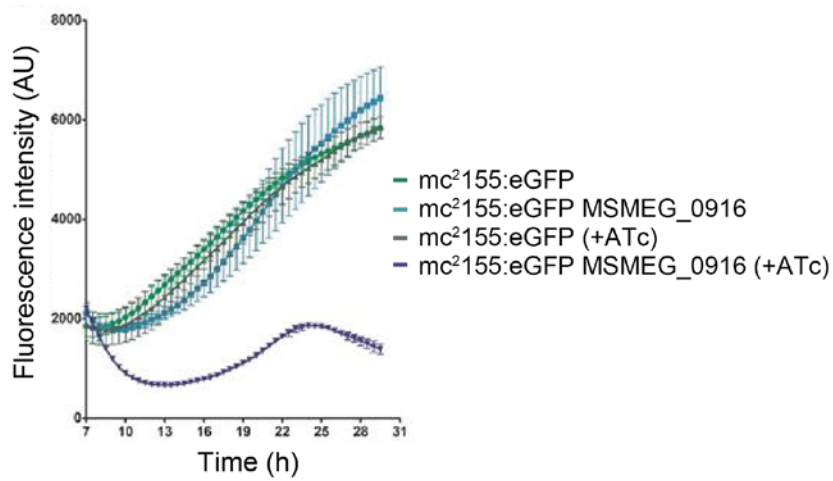

966 **Fig. S6.**  
967 Growth of MSM overexpressing *MSMEG\_0916* in 7H9 broth. MSM *mc*<sup>2</sup>155 wt and *mc*<sup>2</sup>155/pDTCF-  
968 *MSMEG\_0916* strains were transformed with an eGFP integrative vector. Growth of *mc*<sup>2</sup>155 wt and  
969 *mc*<sup>2</sup>155/pDTCF-*MSMEG\_0916* was monitored for fluorescence intensity (485/520 nm) in 96-well plates  
970 in the presence or absence of ATc.

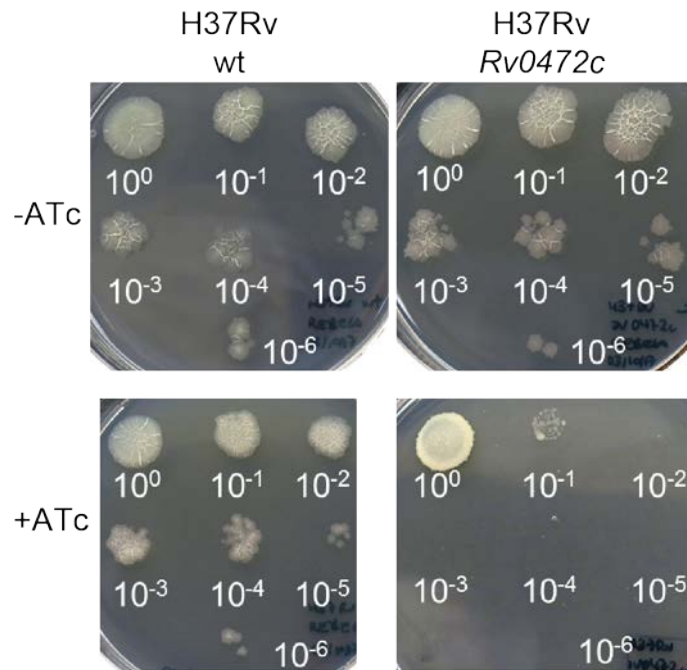

972 **Fig. S7.**  
974 Cell viability of MTB overexpressing *Rv0472c*. Serial ten-fold dilutions of MTB H37Rv wild  
type (wt) and MTB with inducible overexpression of *Rv0472c* were spotted on 7H10 agar plates  
with or without ATc.

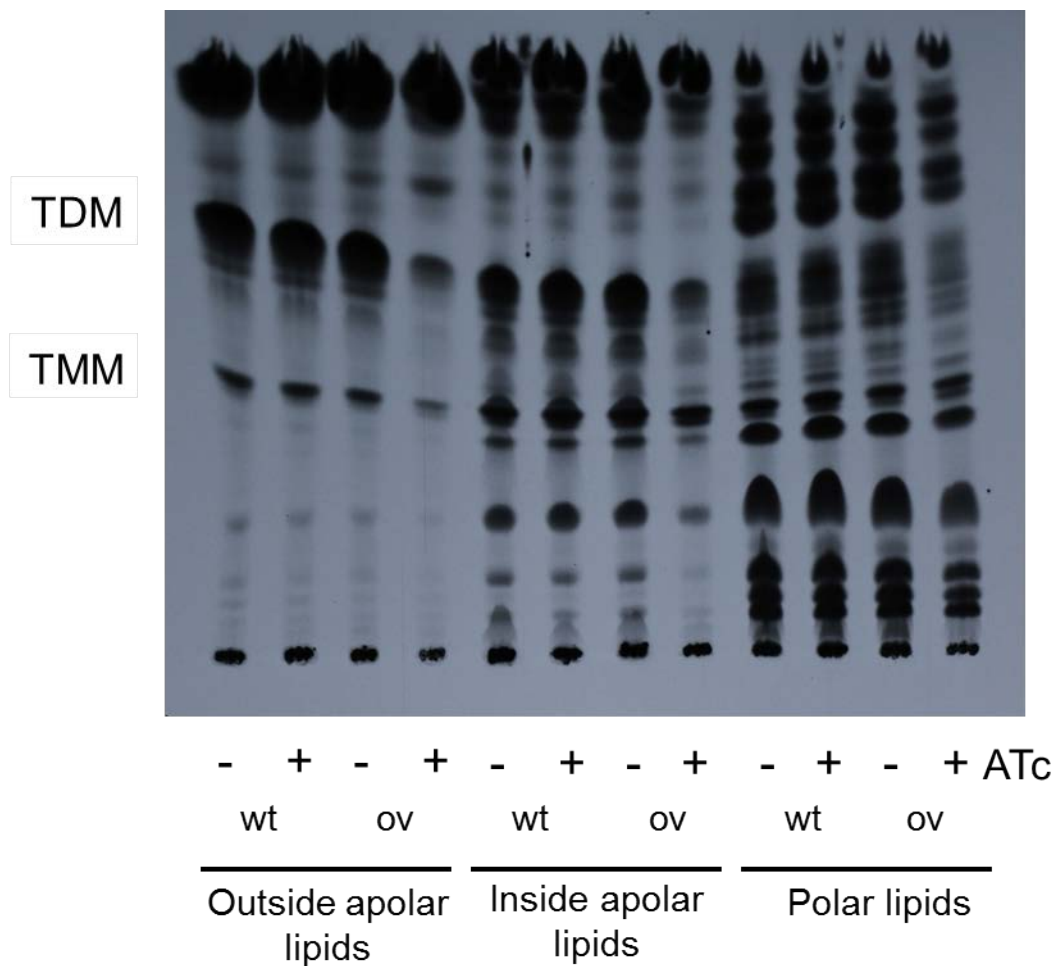

976

**Fig. S8.**

978 TLC of outside, inside and apolar lipids extracted from MSM wildtype (wt) and MSM overexpressing  
980 *MSMEG\_0916* (*ov*) in the presence (+) or absence (-) of ATc. Trehalose dimycolate (TDM) and trehalose  
monomycolate (TMM) were extracted following labeling and analysed by autoradiography-TLC using  
equal counts (15,000 cpm) for each lane.

982

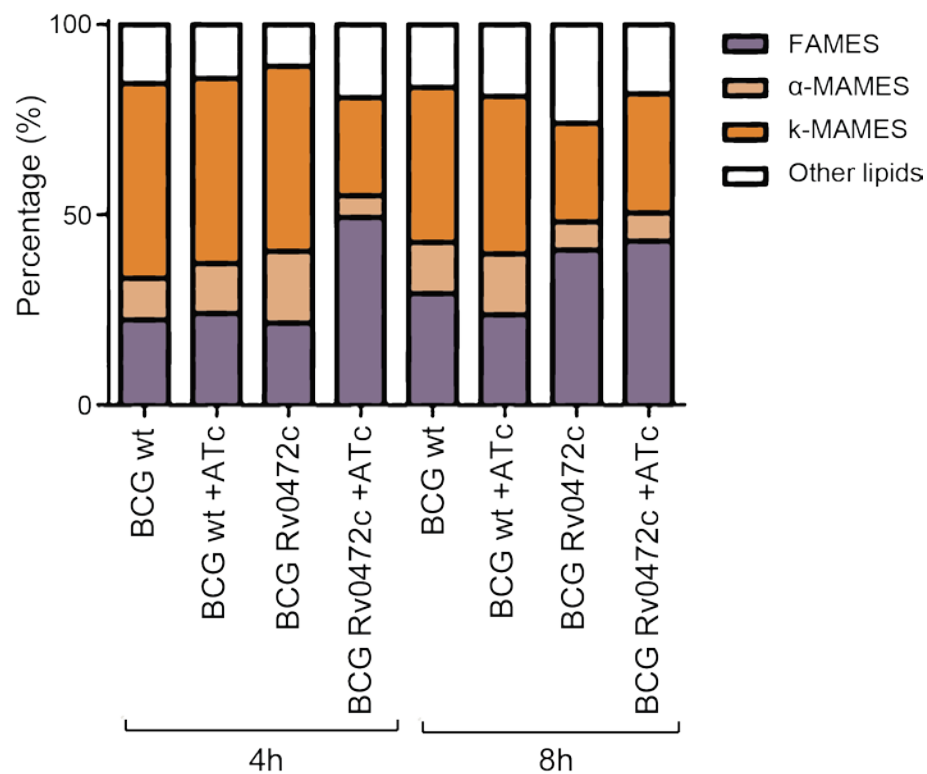

984

**Fig. S9.**

986 Bar graph showing the relative amounts of  $^{14}\text{C}$ -labeled methyl esters from BCG wildtype (wt)  
987 and BCG overexpressing *Rv0472c* species with or without ATc for 4 h and 8 h. The methyl ester  
988 amounts are indicated as percentages of total amounts of  $^{14}\text{C}$ -labeled methyl esters detected on  
989 the TLC plate shown in **Fig. 5D**, as determined by densitometry. FAMES; fatty acyl methyl  
990 esters. α-MAMES; α-mycolic acid methyl esters. k-MAMES; keto-mycolic acid methyl esters.

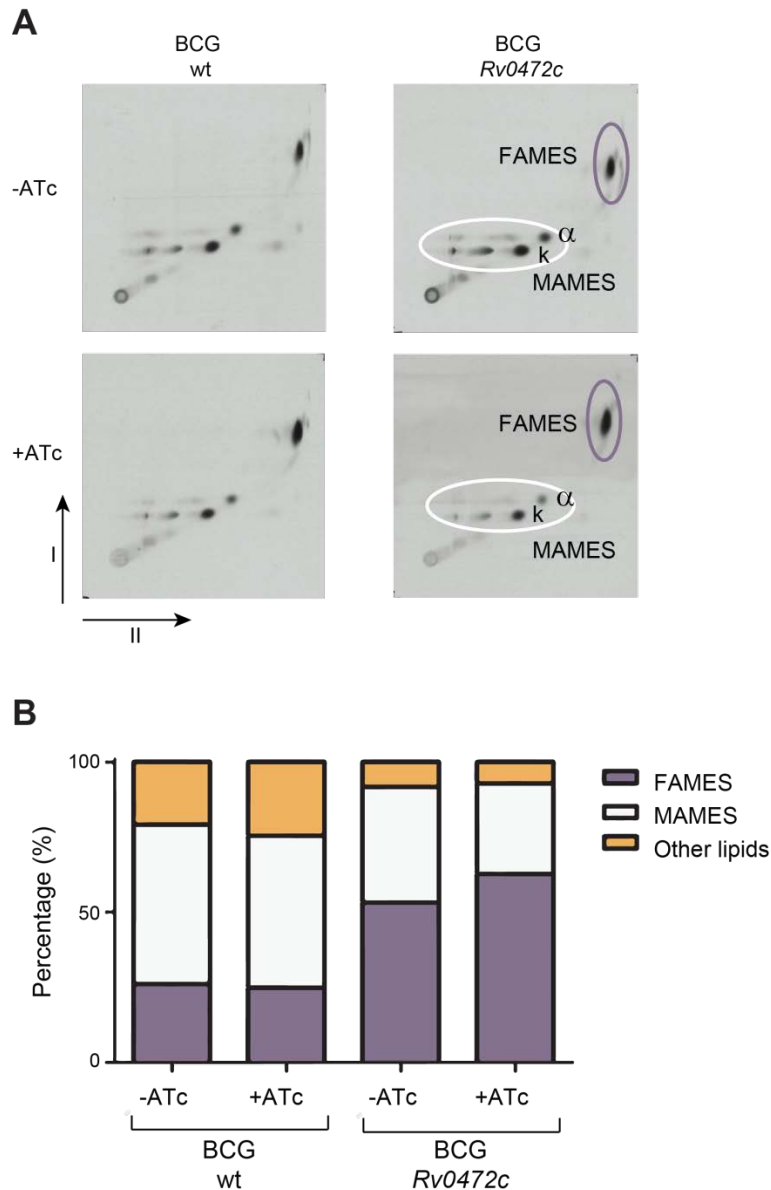

992

**Fig. S10.**

994 TLC analysis of FAMES and MAMES from BCG overexpressing *Rv0472c*. (A) 2D-argention  
996 TLC analysis of fatty acid methyl esters (FAMES) and mycolic acid methyl esters (MAMES)  
998 from inside apolar lipid extracts of BCG wildtype (wt) and BCG overexpressing *Rv0472c* in the  
presence or absence of ATc. Alpha( $\alpha$ )-MAME and keto(k)-MAME species are indicated. (B)  
1000 Bar graph showing the relative amounts of  $^{14}\text{C}$ -labeled MAMES and FAMES as percentages of  
total amounts of  $^{14}\text{C}$ -labeled methyl esters detected on the 2D TLC plates shown in A, as  
determined by densitometry.

1002

1004

|                                  | <b>Non-zero genes (%)</b> | <b>Total read counts</b> | <b>Mean count</b> | <b>Noise</b> |
|----------------------------------|---------------------------|--------------------------|-------------------|--------------|
| AM T24h (deposition = 8100 CFUs) | 49.88                     | 997861                   | 354               | 1.95         |
| AM T24h (deposition = 5633 CFUs) | 31.23                     | 1077327                  | 611               | 2.03         |
| AM T24h (deposition = 4333 CFUs) | 14.4                      | 183380                   | 226               | 1.81         |
| extracellular 24h                | 98.22                     | 1588332                  | 286               | 2.01         |
| extracellular 24h                | 98.32                     | 2867574                  | 517               | 1.96         |
| extracellular 24h                | 97.85                     | 1603959                  | 290               | 1.99         |

1006

**Table S1.**

Summary analysis from Path-seq data of alveolar macrophages (AMs) from MTB infected mice and extracellular MTB grown in 7H9 broth.

1008

1010

**Data S1. (separate file)**

1012 Significantly differentially expressed genes of MTB from *in vivo* infection vs extracellular MTB  
using Path-seq.

1014

**Data S2. (separate file)**

1016 Significantly differentially expressed genes of MTB from *in vitro* infection vs extracellular MTB  
using Path-seq.

1018

1020

1022
